1 **Only a combination of social distancing and massive testing can**  
2 **effectively stop COVID-19 progression in densely populated urban areas**

3

4 Mario Moisés Alvarez and Grissel Trujillo-de Santiago<sup>1,3</sup>

5

6 <sup>1</sup> Centro de Biotecnología-FEMSA, Tecnológico de Monterrey, Monterrey 64849, NL, México

7 <sup>2</sup> Departamento de Bioingeniería, Escuela de Ingeniería y Ciencias, Tecnológico de Monterrey,

8 Monterrey 64849, NL, México

9 <sup>3</sup> Departamento de Ingeniería Mecatrónica y Eléctrica, Escuela de Ingeniería y Ciencias,

10 Tecnológico de Monterrey, Monterrey 64849, NL, México

11 (\*) corresponding author: [mario.alvarez@tec.mx](mailto:mario.alvarez@tec.mx)

12

13 **Abstract**

14

15 We present a simple epidemiological model that includes demographic density, social  
16 distancing, and efficacy of massive testing and quarantine as the main parameters to model  
17 the progression of COVID-19 pandemics in densely populated urban areas (i.e., above  
18 5,000 inhabitants km<sup>2</sup>). Our model demonstrates that effective containment of pandemic  
19 progression in densely populated cities is achieved only by combining social distancing and  
20 by widespread testing for quarantining of infected subjects. This finding has profound  
21 epidemiological significance and sheds light on the controversy regarding the relative  
22 effectiveness of widespread testing and social distancing. Our simple epidemiological  
23 simulator is also useful for assessing the efficacy of governmental/societal responses to an  
24 outbreak.

25 This study also has relevant implications for the concept of smart cities, as densely  
26 populated areas are hotspots that are highly vulnerable to epidemic crises.

27

28 Keywords: *COVID-19, SARS-CoV2, mathematical modeling, social distancing, massive*  
29 *testing, pandemic, demographic density*

30

31 Submitted to *Science Advances*

32

### 33 **Introduction**

34 COVID-19 has clearly illustrated that we were unprepared for the second pandemic of the  
35 21<sup>st</sup> century. By the fourth week of June 2020, the official cumulative number of infected  
36 persons worldwide was more than 10,000,000, with a death toll higher than 500,000.  
37 COVID-19 has not recognized frontiers; it started in China, migrated to Iran, and formed a  
38 later epicenter in Italy and Spain. It then extended to France, England, Germany, and other  
39 European Countries. Now, COVID-19 has a strong presence in Las Americas, mainly in the  
40 USA, Brazil, and Mexico(1, 2). Among all affected territories, pandemic COVID-19 has  
41 encountered containment responses ranging from aggressive to mediocre. Some of these  
42 responses, namely the ones that appear to be more successful, have been based on a  
43 combination of social distancing and massive testing and selective quarantine(3). Social  
44 distancing effectively decreases the progression of the disease essentially by decreasing the  
45 demographic density, while massive testing enables the identification of infected subjects  
46 and opportune quarantining (which is technically a version of selective social distancing).  
47 However, discussion persists regarding the relative effectiveness of countermeasures such  
48 as social distancing or massive testing. Countries like South Korea have based their strategy  
49 of containment on strict social distancing and massive testing in their open populations(4).  
50 Spain initially based its strategy on gradual social distancing. Later, it significantly

51 increased its diagnostic efforts to plateau the pandemic. England started by using testing  
52 mainly for epidemiological recording, but later significantly scaled up its efforts to  
53 aggressively diagnose its population. By contrast, Mexican officials have openly declared  
54 that massive testing and quarantine have no significant value as a countermeasure for  
55 COVID-19 progression and that diagnostics is merely informative. Consequently, Mexico  
56 is one of the countries with the fewest diagnostic tests conducted per 100,000  
57 inhabitants(5).

58 The benefit of social distancing and massive diagnostics has not only been a subject of  
59 controversy(6), but assessing the potential benefit has also been challenging. Here, we  
60 introduce a simple mathematical model with a formulation that explicitly considers  
61 demographic variables (i.e., the demographic density and the total population) to calculate  
62 the progression of COVID-19 in urban areas. The model also considers the effectiveness of  
63 social distancing measures and of massive testing for expeditious identification and  
64 quarantining of infective subjects as inputs. We present a wide range of simulation  
65 scenarios for “representative” urban areas and show that both social distancing and  
66 widespread and effective testing should be combined for effective containment of the  
67 pandemic advance in densely populated urban areas.

68

## 69 **Rationale of the model formulation**

70 We developed a very simple epidemiological model for the propagation of COVID-19 in  
71 urban areas. The model considers two variable populations of individuals, infected (X) and  
72 retrieved (R). The cumulative number of infected patients (X) is the total number of  
73 subjects among the population that have been infected by SARS-CoV-2. The number of

74 retrieved patients should be interpreted as the number of individuals that have been  
75 retrieved from the general population and are not contributing to the propagation of  
76 COVID-19. Retrieved subjects include subjects who have recovered from the infection and  
77 do not shed virus, quarantined individuals, and deceased patients. Importantly, the model  
78 assumes that infection results in (at least) short-term immunity upon recovery. This  
79 assumption is based in experimental evidence that suggests that rhesus macaques that  
80 recovered from SARS-CoV-2 infection could not be reinfected(7). However, the  
81 acquisition of full immunity to reinfection has not been confirmed in humans, although it is  
82 well documented for other coronavirus infections, such as SARS and MERS(8, 9).

83 Two set of parameters, demographic and clinical/epidemiological, determine the interplay  
84 between these two main populations and other subpopulations that include asymptomatic  
85 infected (A), symptomatic infected (S), and deceased (D). Clinical parameters include an  
86 intrinsic infection rate constant ( $\mu_o$ ) that is calculated from the initial stage of the pandemic  
87 in that particular region, the fraction of asymptomatic patients ( $a$ ), the delay between the  
88 period of viral shedding by an infected patient ( $delay_r$ ), the period from the onset of  
89 shedding to the result of first diagnosis and quarantine in the fraction of patients effectively  
90 diagnosed ( $delay_q$ ), and the fraction of infected patients effectively diagnosed and  
91 retrieved from the population ( $\alpha$ ). Demographic parameters include the population of the  
92 region ( $P_o$ ), the relative demographic density ( $\delta$ ), the social distancing ( $\sigma$ ), and the fraction  
93 of infected individuals retrieved from the population due to massive and effective testing  
94 ( $\alpha$ ). The model is based on a set of two simple differential equations.

95

96 
$$dX/dt = \mu_o \delta (1-\sigma) (X-R) (P_o-X)/P_o$$
 equation (1)

97 
$$dR/dt = \alpha \int_{t=0}^{t=t-delay_q} dX/dt - (1-\alpha) \int_{t=0}^{t=t-delay_r} dX/dt$$
 equation (2)

98

99 The first equation of the set (equation 1) states that the rate of accumulation of infected  
100 habitants (symptomatic and asymptomatic) in an urban area (assumed to be a closed  
101 system) is proportional to the number of infective subjects ( $X-R$ ) present in that population  
102 at a given point and the fraction of the population susceptible to infection ( $(P_0-X)/P_0$ ). Note  
103 that the number of infective subjects is given by the difference between the accumulated  
104 number of infected subjects ( $X$ ) and the number of retrieved subjects ( $R$ ). The fraction of  
105 the susceptible population decreases over time as more inhabitants in the community get  
106 infected. The proportionality constant in equation 1 ( $\mu_0$ ) is an intrinsic rate of infection that  
107 is weighted by the population density ( $\delta$ ) in that urban area, and the effective fractional  
108 reduction of social distancing on the population density ( $1-\sigma$ ).

109 The second equation (equation 2) describes the rate at which infected patients are retrieved  
110 from the infective population. Eventually, all infected subjects are retrieved from the  
111 population of infected individuals, but this occurs at distinctive rates. A fraction of infected  
112 individuals ( $\alpha$ ) is effectively retrieved from the general population soon after the onset of  
113 symptoms or after a positive diagnosis. Another fraction of infected subjects ( $1-\alpha$ ) is not  
114 effectively retrieved from the population until they have recovered or died from the disease.  
115 Therefore, in our formulation, the overall rate of retrieval ( $dR/dt$ ) has two distinctive  
116 contributions, each one associated with different terms on the right-hand side of equation 2.  
117 The first term accounts for the active rate of retrieving infected patients through the  
118 diagnosis and quarantine of SARS-CoV-2 positive subjects. For this term, the delay from  
119 the onset of virus shedding to positive diagnosis and quarantine ( $\text{delay}_q$ ) is considered  
120 short (*i.e.*, between two or three days), to account for a reasonable time between the  
121 positive diagnosis and the action of quarantine. In our model formulation, this term is

122 represented by  $(1-\alpha)$ . A second term relates to the recovery or death of infected patients  
123 (symptomatic or asymptomatic) and is represented by the integral of all infected subjects  
124 recovered or deceased from the onset of the epidemic episode in the region, considering a  
125 delay of 21 days ( $\text{delay}_r$ ), which accounts for the average time of recovery of an infected  
126 individual.

127 Note that the simultaneous solution of equations 1 and 2 is sufficient to describe the  
128 evolution of the number of asymptomatic individuals (A), symptomatic individuals (S), and  
129 deceased patients (D) through the specification of several constants and simple relations.

130 
$$a \frac{dX}{dt} = \frac{dA}{dt} \quad \text{equation (3)}$$

131 
$$(1-a) \frac{dX}{dt} = \frac{dS}{dt} \quad \text{equation (4)}$$

132 
$$m [(1-a) \frac{dX}{dt}] = \frac{dD}{dt} \quad \text{equation (5)}$$

133 Here,  $\mathbf{a}$  is the fraction of asymptomatic subjects among the infected population,  $(1-\mathbf{a})$  is the  
134 fraction of infected individuals that exhibit symptoms, and  $\mathbf{m}$  is the mortality rate expressed  
135 as a fraction of symptomatic individuals.

136

### 137 **Selection of relevant epidemiological parameters for COVID-19**

138 As with any epidemiological model, this model relies on some basic assumptions that must  
139 be sustained in clinical or epidemiological data. We now briefly discuss the assumptions  
140 that were made and the rationale behind the relevant values of the parameters of the model:  
141 the fraction of asymptomatic infected, the average time to recover, the fraction of  
142 symptomatic patients that would require hospitalization, and the average time of bed  
143 occupancy per hospitalized patient.

144 The fraction of asymptomatic infected is one of the critical inputs to the model; it  
145 determines the final and maximum feasible threshold of symptomatic infected. However,  
146 the current evidence is not yet sufficient to support a conclusive value for this parameter.  
147 Nevertheless, a recent serological study conducted in New York City (NYC) found anti-  
148 SARS-CoV-2 IGGs among 21.2% of the population(10) ([www.cnn.com](http://www.cnn.com)), and this result is  
149 consistent with previous information related to massive epidemic episodes. For instance, in  
150 the context of the pandemic influenza A/H1N1/2009, up to 20–40% of the population in  
151 urban areas (i.e., Monterrey, México, and Pittsburgh, USA) (11, 12) exhibited specific  
152 antibodies regardless of experiencing symptoms, while the fraction of confirmed  
153 symptomatic infections was lower than less than 10%. This serological result based  
154 exclusively on information from NYC suggests that more than 90% of exposed New  
155 Yorkers (~91.4%) were asymptomatic or exhibited minor symptoms. Based on this (still  
156 unpublished) data, we assumed a symptomatic fraction of only 10% in the calculations and  
157 forecasts presented here.

158 In addition, the average time of sickness was set at 21 days in our simulations, as this is  
159 within the reported range of 14 to 32 days(13), with a median time to recovery of 21  
160 days(14). Viral shedding can last for three to four weeks after the onset of symptoms, with  
161 a peak at day 10-11.(15) Therefore, we assume that all those infected not quarantined  
162 could continue to transmit the virus until full recovery (21 days). Similarly, asymptomatic  
163 patients are only removed from the pool of susceptible persons after full virus clearance.  
164 Note that, in the current version of our model, asymptomatic patients are considered part of  
165 the population capable of transmitting COVID-19; reported evidence that suggests that  
166 asymptomatic subjects (or minimally symptomatic patients) may exhibit similar viral

167 loads(16) to those of symptomatic patients and may be active transmitters of the disease(17,  
168 18).

169 The average fraction of deceased patients worldwide is estimated as 0.064 of those infected  
170 21 days before. This mortality percentage (case fatality rate) lies within the range reported  
171 in the recent COVID-19 literature(19–22). The time lapse of 14 days between the onset of  
172 disease and death was statistically estimated by Linton et al. in a recent report (23). We also  
173 consider that the average time for bed occupancy of hospitalized patients is 14 days. The  
174 estimated average hospitalization stays range from 9.3 to 13 days in the United States (24)  
175 and China(25, 26), but much longer stays have been reported in intensive care units in Italy  
176 (20 to 25 days)(27). Anecdotal data collected in México suggests that hospitalization stays  
177 of at least two weeks are a more accurate figure for Latin American societies.

178

## 179 **Definition of representative scenarios**

180 We aimed to reproduce representative settings for COVID-19 progression; therefore, we  
181 selected two hypothetical but realistic urban scenarios. Figure 1 shows the most densely  
182 populated cities in the world (according to information concentrated in  
183 [www.citymayors.com](http://www.citymayors.com))(28) represented by dots in a bidimensional plot of demographic  
184 density versus population. Two clusters of cities can be readily identified. The first group of  
185 5 to7 important cities in the world (i.e, Porto Alegre, Ankara, Athens, Guadalajara,  
186 Monterrey, Barcelona) have populations between 3.0 and 3.7 million inhabitants and a  
187 demographic density of ~5,000 inhabitants per square kilometer (hab km<sup>2</sup>). A second group  
188 is centered on the coordinates of a population of 10 million citizens and a demographic  
189 density of 10,000 hab km<sup>2</sup> (i.e., Baghdad, Ho Chi Minh, Bangalore, Tianjin, Kinshasa,



190 Hyderabad). Based on this analysis, we centered our estimates of COVID-19 progression in  
191 these two classes of “representative” cities (3.5 million inhabitants, 5,000 hab km<sup>2</sup>; and 10  
192 million citizens, 10,000 hab km<sup>2</sup>).  
193

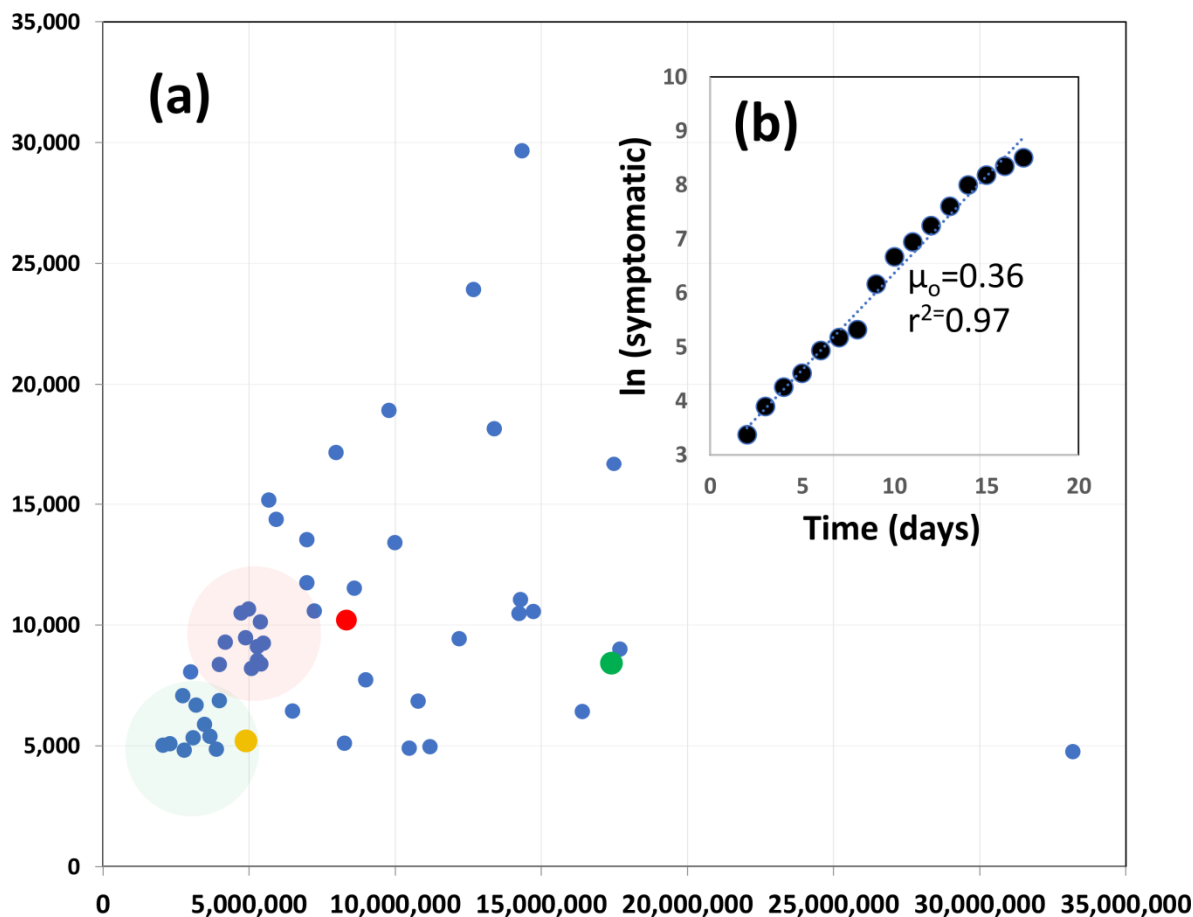

194  
195

196 **Figure 1. Population and demographic density of the world largest cities.** (a) Two clusters of  
197 cities, referred here as Type I (green cluster) and Type II (red cluster) are indicated in a plot of  
198 population versus demographic density. The 51 largest cities in the world, according to  
199 [www.citymayors.com/](http://www.citymayors.com/), are included(28). Madrid Spain is indicated in yellow (•), New York City in  
200 red (•), and Mexico City in green (•). (b) Natural log of the number of symptomatic versus time in  
201 Madrid from March 2 to March 17 (initial stage of the pandemics in Spain). The initial rate of  
202 infection ( $\mu_o$ ) can be calculated from the slope of this straight line.

203

204 We also based our estimates of  $\mu_o$ , the intrinsic rate of COVID\_19 propagation, on data  
205 extracted from the local dynamics of the pandemics in Madrid (a city in our first category)  
206 and New York City (a city in our second category). These two cities also belong to a  
207 limited number of cities that have generated reliable datasets on the local progression of the  
208 number of COVID-19 positive cases over time. We calculate the value of  $\mu_o$  (*i.e.*, the  
209 intrinsic rate of infectivity of SARS-CoV2 before interventions) by assuming that the initial  
210 rate of propagation is  $d(X)/dt = \mu_o [X]$ , where  $[X]$  is the number of initially infected  
211 subjects. We then simply calculate the intrinsic rate of infection from the initial slope of a  
212 plot of  $\ln [X]$  vs time, which is a usual procedure for calculation of intrinsic growth rates in  
213 cell culture scenarios under the assumption of first order rate growth dependence.  
214 Following this rationale, we set  $\mu_o$  for all our simulations. Consistently, we noted that the  
215 initial rate of propagation observed in NYC, a city with twice the demographic density of  
216 Madrid, doubles this  $\mu_o$  value. Therefore, we take the demographic density of Madrid as a  
217 reference (5,185 hab km<sup>2</sup>) and assume that multiplying  $\mu_o$  by the normalized demographic  
218 density (with respect to that in Madrid) is a reasonable procedure for adapting the model to  
219 any urban area.

220

## 221 **Effect of social distancing and massive testing**

222 Social distancing has been regarded as the one of the most effective buffering measures for  
223 containment of local COVID-19 epidemics(29–32). However, the effectiveness of massive  
224 testing, either alone or in combination with social distancing, has not been evaluated  
225 formally.

226 First, we conducted simulations in which we evaluated the independent impact of different  
227 degrees of social distancing and massive testing in a Type I city (3.5 million inhabitants and  
228 medium demographic density). Figure 2a shows the impact of different degrees of social  
229 distancing at a fixed and basal value of massive testing. In this simulation, a basal value of  
230 social distancing ( $\alpha=0.1$ ) means that only 10% of the infected patients are diagnosed and  
231 quarantined, while the rest of the infected subjects continue active until recovery. This  
232 strategy is consistent with that adopted by countries that diagnosed essentially only those  
233 subjects who were symptomatic and asked for medical assistance (i.e., México, Chile, and  
234 Bolivia, with fewer than 2 tests per confirmed case). The pandemic progression (number of  
235 cumulative symptomatic cases, new infections per day, and bed occupancy per day) is  
236 indicated with grey curves for a reference scenario with no social distancing and basal level  
237 of testing. Higher degrees of enforcement of social distancing (i.e., such that the  
238 demographic density is effectively reduced by 20, 40, and 60%) are presented with blue,  
239 green, and red lines, respectively. Levels of social distancing of 20% and 40% delay the  
240 pandemic curve by 15 and 30 days, whereas the pandemic progression is successfully  
241 buffered only when social distancing effectively reduces demographic density (and  
242 therefore activity) by 60% for extended times (i.e., for 6 months). Although eventually  
243 effective, this strategy of drastic and prolonged social distancing may be unsustainable or  
244 drastically damaging for the economy of low and medium income societies(31).

245 Figure 2b presents predictions for scenarios where no social distancing is implemented, but  
246 where the level of diagnostic testing is increased from a basal value (10% of infected are  
247 diagnosed and quarantined) to situations were 20, 30, and 40% of infected patients  
248 (symptomatic and asymptomatic) are diagnosed within the first 3 days of viral shedding

249 and quarantined. These levels of massive testing, in the absence of social distancing  
250 enforcement, are not sufficiently effective to buffer the pandemic.

251 Figure 2c shows a scenario in which social distancing is set at 20% and different testing  
252 emphasis is applied. As before, trends related to the reference scenario of low testing and  
253 no social distance enforcement are indicated in grey. The combination of moderate social  
254 distancing and testing renders better results than any one of the two strategies  
255 independently applied. When social distancing is elevated to a 40% and combined with  
256 more intensive testing efforts, the epidemic peak is dramatically delayed.

257

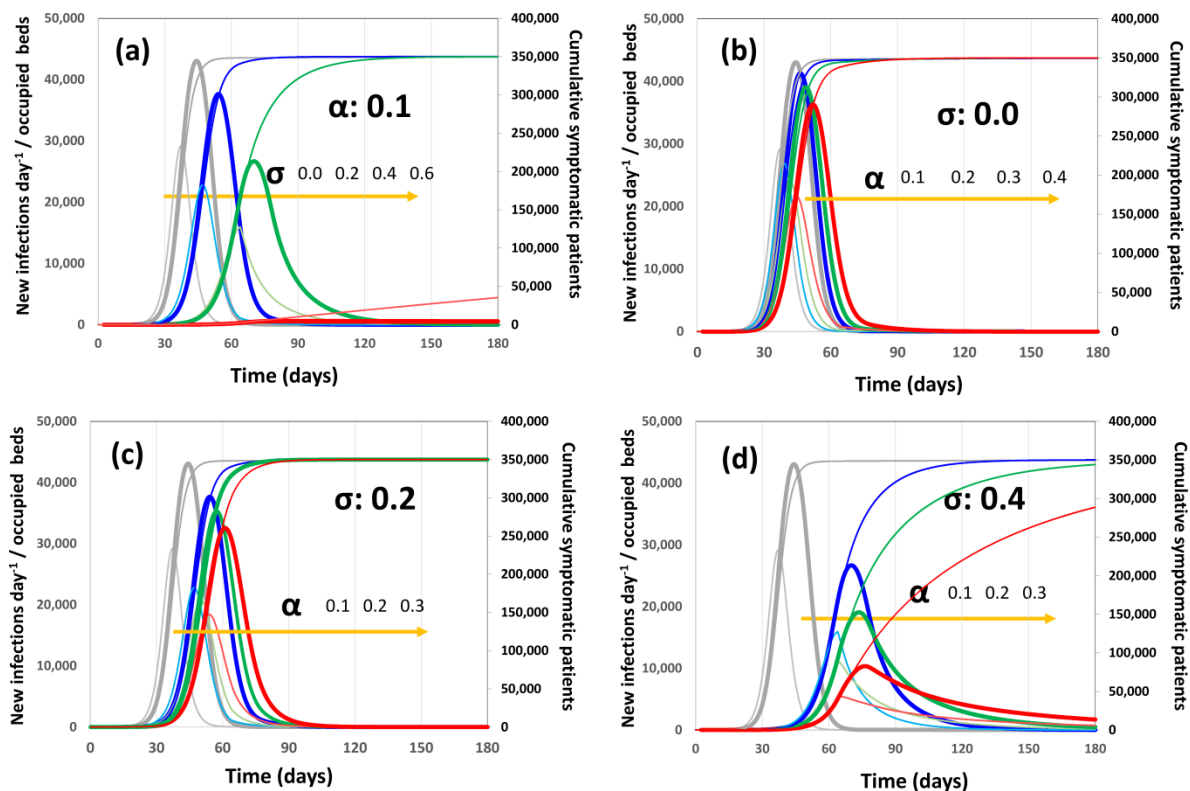

258  
259

260 **Figure 2. Pandemic progression scenarios for a Type I city ( $3.5 \times 10^6$  citizens) with a medium**  
261 **demographic density ( $5,500$  inhabitants  $\text{km}^{-2}$ ).** The number of new infections per day (thin and  
262 light line curves), the bed occupancy (thick line curves) and the cumulative number of infections  
263 (thin cumulative curve) are presented for each scenario. (a) Scenario I: basal level of testing ( $\alpha=0.1$ )  
264 and increasingly higher levels of social distancing:  $\sigma=0.0$  (gray),  $\sigma=0.2$  (blue),  $\sigma=0.4$  (green), and

265  $\sigma=0.6$  (red). (b) Scenario II: social distance not enforced ( $\sigma=0.0$ ), and increasing values of testing  
266  $\alpha=0.1$  (gray),  $\alpha=0.2$  (blue),  $\alpha=0.3$  (green), and  $\alpha=0.4$  (red). (c) Scenario III: social distance modestly  
267 enforced ( $\sigma=0.2$ ), and increasing values of testing,  $\alpha=0.1$  (blue),  $\alpha=0.2$  (green), and  $\alpha=0.3$  (red). (d)  
268 Scenario IV: social distance moderately enforced ( $\sigma=0.4$ ), and increasing values of testing  $\alpha=0.2$   
269 (blue),  $\alpha=0.3$  (green), and  $\alpha=0.4$  (red). Gray curves correspond to the pandemic progression with  
270 minimum intervention (no social distancing and  $\alpha=0.1$ ).

271

272 A value of 40% social distancing in combination with an effort to identify and quarantine  
273 30% of newly infected subjects delays the peak of maximum bed occupancy from day 25 to  
274 day 75, and lowers the highest demand of beds from 75,000 to fewer than 30,000. Increased  
275 testing at 40% social distancing further contributes to extinguish the epidemic peak.

276 We also estimated the pandemic progression under the same set of scenarios for a densely  
277 populated city (Type II:  $5 \times 10^6$  citizens and 10,000 hab km<sup>2</sup>). The results similarly indicate  
278 that only a combined strategy of social distancing and scaled-up testing and quarantine may  
279 effectively control the pandemic progression due to “selective social distancing”. However,  
280 the higher population leads to increases in the number of cases in the same time frame (let  
281 us say, the first 120 days from pandemic onset) and in the maximum threshold of  
282 symptomatic cases. The higher demographic density also causes a higher rate of transition.  
283 Therefore, the containment strategies need to be stronger than those required for Type I  
284 cities. For example, in the absence of intensified testing, the degree of social distancing  
285 required to buffer the pandemic is much higher in a Type II city ( $\alpha=0.75$ ) than in a type I  
286 city ( $\alpha=0.60$ ). Similarly, only aggressive social distancing interventions combined with  
287 intensified testing, *i.e.*, ( $\sigma=0.6$ ,  $\alpha=0.3$ ) or ( $\sigma=0.7$ ,  $\alpha=0.5$ ) can mitigate the pandemic  
288 progression in larger or denser cities (Type II). A summary of the results for different  
289 combinations of scenarios is presented in Tables 1 and 2.

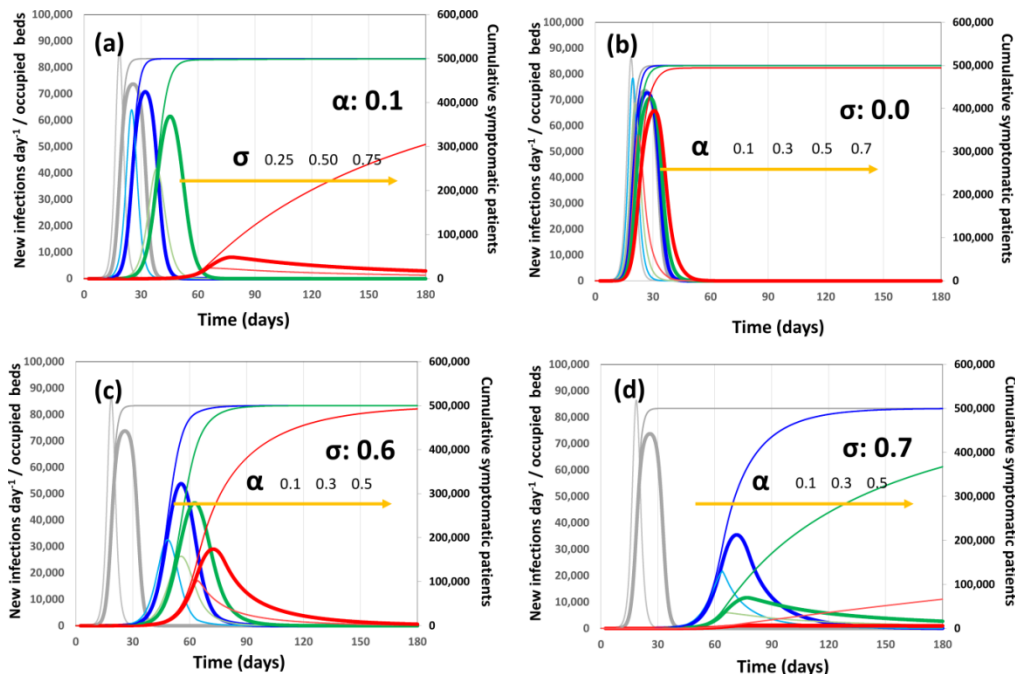

290

291 **Figure 3. Pandemic progression scenarios for a Type II city ( $5.0 \times 10^6$  citizens) with a high**  
 292 **demographic density ( $10,000$  inhabitants  $\text{km}^{-2}$ ).** The number of new infections per day (thin and  
 293 light line curves), the bed occupancy (thick line curves) and the cumulative number of infections  
 294 (thin cumulative curve) are presented for each scenario. (a) Scenario I: basal level of testing ( $\alpha=0.1$ )  
 295 and increasingly higher levels of social distancing:  $\sigma=0.00$  (gray),  $\sigma=0.25$  (blue),  $\sigma=0.50$  (green),  
 296 and  $\sigma=0.75$  (red). (b) Scenario II: social distance not enforced ( $\sigma=0.0$ ), and increasing values of  
 297 testing  $\alpha=0.1$  (gray),  $\alpha=0.3$  (blue),  $\alpha=0.5$  (green), and  $\alpha=0.7$  (red). (c) Scenario III: social distance  
 298 enforced ( $\sigma=0.6$ ), and increasing values of testing:  $\alpha=0.1$  (blue),  $\alpha=0.3$  (green), and  $\alpha=0.5$  (red). (d)  
 299 Scenario IV: social distance moderately enforced ( $\sigma=0.7$ ), and increasing values of testing:  $\alpha=0.1$   
 300 (blue),  $\alpha=0.3$  (green), and  $\alpha=0.5$  (red). Gray curves correspond to the pandemic progression with  
 301 minimum intervention (no social distancing and  $\alpha=0.1$ ).

302

303 We present scenarios for both moderately and densely populated cities (Type I and II). Four  
 304 different indicators are calculated for each scenario, including the day of the epidemic peak,  
 305 the number of new infection cases at the epidemic peak, the cumulative number of  
 306 symptomatic infections after 120 days of the local pandemic onset (4 months), and the  
 307 maximum bed occupancy.

308 **Table 1.** Effect of social distancing and testing in a city with a demographic density of 5,500 inhabitants/km<sup>2</sup> and a population of 3.5 × 10<sup>6</sup>  
 309 persons).

|            |                             | $\alpha$                    |           |           |           |           |           |           |           |           |         |
|------------|-----------------------------|-----------------------------|-----------|-----------|-----------|-----------|-----------|-----------|-----------|-----------|---------|
|            |                             | 0.10                        | 0.20      | 0.30      | 0.40      | 0.50      | 0.60      | 0.70      | 0.80      | 0.90      |         |
| $\sigma$ : | 0.00                        | peak @ day:                 | 38.00     | 39.00     | 42.00     | 45.00     | 50.00     | 56.00     | 64.00     | 70.00     | 100.00  |
|            |                             | infected after 120 days:    | 349037.52 | 349072.31 | 349410.58 | 349731.45 | 349801.94 | 349008.93 | 323718.47 | 134600.03 | 5963.75 |
|            |                             | peak of infection (hab/day) | 29155.11  | 26837.36  | 24343.10  | 21633.49  | 18652.11  | 15311.81  | 11469.93  | 2849.59   | 90.84   |
|            |                             | maximum oc beds:            | 43076.11  | 41297.81  | 39084.22  | 36297.24  | 32740.85  | 28128.49  | 20667.05  | 5774.46   | 190.73  |
|            | 0.25                        | peak @ day:                 | 51.00     | 54.00     | 59.00     | 64.00     | 65.00     | 70.00     | 81.00     | 90.00     | 90.00   |
|            |                             | infected after 120 days:    | 349994.09 | 349980.90 | 349723.77 | 342776.43 | 274280.90 | 122542.87 | 24923.94  | 2614.45   | 248.17  |
|            |                             | peak of infection (hab/day) | 21114.08  | 19067.32  | 16862.56  | 14462.14  | 8280.49   | 2397.63   | 398.56    | 37.26     | 2.59    |
|            |                             | maximum oc beds:            | 35889.86  | 33437.60  | 30474.06  | 25109.72  | 14935.49  | 4900.12   | 833.91    | 78.27     | 5.45    |
|            | 0.5                         | peak @ day:                 | 67.00     | 67.00     | 76.00     | 81.00     | 82.00     | 86.00     | 88.00     |           |         |
|            |                             | infected after 120 days:    | 175936.83 | 91893.77  | 38845.99  | 13861.23  | 4332.07   | 1227.77   | 341.99    |           |         |
|            |                             | peak of infection (hab/day) | 3803.14   | 1649.97   | 632.51    | 215.77    | 64.49     | 17.03     | 4.18      |           |         |
|            |                             | maximum oc beds:            | 7523.66   | 3411.07   | 1325.73   | 452.39    | 135.43    | 35.79     | 8.78      |           |         |
| 0.6        | peak @ day:                 | 77.00                       | 81.00     | 83.00     | 86.00     |           |           |           |           |           |         |
|            | infected after 120 days:    | 18919.36                    | 8432.49   | 3534.87   | 1408.84   |           |           |           |           |           |         |
|            | peak of infection (hab/day) | 298.44                      | 129.46    | 52.56     | 20.02     |           |           |           |           |           |         |
|            | maximum oc beds:            | 625.81                      | 271.66    | 110.40    | 42.07     |           |           |           |           |           |         |
| 0.7        | peak @ day:                 | 88.00                       |           |           |           |           |           |           |           |           |         |
|            | infected after 120 days:    | 1147.06                     |           |           |           |           |           |           |           |           |         |
|            | peak of infection (hab/day) | 16.38                       |           |           |           |           |           |           |           |           |         |
|            | maximum oc beds:            | 34.42                       |           |           |           |           |           |           |           |           |         |

310 (\*) Conditions at which the progression can be controlled or extinguished are indicated in light and intense green, respectively.

311

312

313 **Table 2.** Effect of social distancing and testing in a city with a demographic density of  $10,000$  inhabitants/ $\text{km}^2$  and a population of  $5.0 \times 10^6$   
 314 persons).

|                             |                             | $\alpha$                    |           |           |           |           |           |           |           |           |           |
|-----------------------------|-----------------------------|-----------------------------|-----------|-----------|-----------|-----------|-----------|-----------|-----------|-----------|-----------|
|                             |                             | 0.10                        | 0.20      | 0.30      | 0.40      | 0.50      | 0.60      | 0.70      | 0.80      | 0.90      |           |
| <b><math>\sigma</math>:</b> | <b>0.00</b>                 | peak @ day:                 | 19.00     | 19.00     | 19.00     | 20.00     | 21.00     | 21.00     | 22.00     | 24.00     | 25.00     |
|                             |                             | infected after 120 days:    | 499989.80 | 499971.06 | 499917.90 | 499766.95 | 499336.94 | 498102.78 | 494503.52 | 483634.61 | 446996.48 |
|                             |                             | peak of infection (hab/day) | 86423.60  | 82575.85  | 78404.48  | 73841.74  | 68794.07  | 63125.83  | 56629.06  | 48953.93  | 39422.43  |
|                             |                             | maximum oc beds:            | 73747.96  | 73345.63  | 72776.58  | 71953.49  | 70731.66  | 68861.46  | 65889.88  | 60938.49  | 52151.75  |
|                             | <b>0.25</b>                 | peak @ day:                 | 25.00     | 26.00     | 27.00     | 28.00     | 30.00     | 32.00     | 35.00     | 39.00     | 47.00     |
|                             |                             | infected after 120 days:    | 499846.93 | 499665.38 | 499268.89 | 498409.15 | 496596.85 | 493100.98 | 487611.16 | 479682.50 | 443985.07 |
|                             |                             | peak of infection (hab/day) | 63930.77  | 60111.56  | 55971.34  | 51440.99  | 46422.90  | 40772.27  | 34255.89  | 26450.93  | 16419.13  |
|                             |                             | maximum oc beds:            | 70822.64  | 69733.12  | 68276.26  | 66293.98  | 63540.74  | 59619.71  | 53853.41  | 44986.81  | 30352.40  |
|                             | <b>0.50</b>                 | peak @ day:                 | 38.00     | 41.00     | 44.00     | 46.00     | 51.00     | 57.00     | 64.00     | 72.00     | 96.00     |
|                             |                             | infected after 120 days:    | 498882.25 | 499096.74 | 499540.23 | 499809.64 | 499807.31 | 498253.90 | 446201.67 | 158799.47 | 6043.61   |
|                             |                             | peak of infection (hab/day) | 41649.98  | 38338.88  | 34775.60  | 30904.68  | 26645.47  | 21873.49  | 15986.09  | 3184.80   | 92.64     |
|                             |                             | maximum oc beds:            | 61537.12  | 58996.65  | 55834.29  | 51852.80  | 46772.08  | 40182.73  | 27909.42  | 6544.93   | 194.56    |
| <b>0.60</b>                 | peak @ day:                 | 49.00                       | 52.00     | 56.00     | 61.00     | 64.00     | 67.00     | 80.00     | 90.00     | 90.00     |           |
|                             | infected after 120 days:    | 499990.74                   | 499988.72 | 499925.44 | 498000.70 | 455117.57 | 259517.01 | 62505.34  | 6072.10   | 390.58    |           |
|                             | peak of infection (hab/day) | 32518.26                    | 29514.18  | 26280.30  | 22762.02  | 17097.07  | 6020.73   | 1047.72   | 91.03     | 4.37      |           |
|                             | maximum oc beds:            | 53795.88                    | 50486.51  | 46503.25  | 41012.07  | 29013.61  | 11822.72  | 2187.91   | 191.19    | 9.19      |           |
| <b>0.70</b>                 | peak @ day:                 | 63.00                       | 65.00     | 67.00     | 67.00     | 76.00     | 82.00     | 94.00     |           |           |           |
|                             | infected after 120 days:    | 486459.87                   | 414489.06 | 263372.49 | 115959.71 | 36130.22  | 8585.78   | 1674.53   |           |           |           |
|                             | peak of infection (hab/day) | 21722.22                    | 13239.99  | 5938.16   | 2056.64   | 581.04    | 130.80    | 23.44     |           |           |           |
|                             | maximum oc beds:            | 35466.46                    | 23463.24  | 11668.79  | 4276.82   | 1216.45   | 274.64    | 49.25     |           |           |           |

315 (\*) Conditions at which the progression can be controlled or extinguished are indicated in light and intense green, respectively



316 Next, we investigated the fidelity of the model prediction by simulating the advance of the  
317 pandemic in Madrid, NYC, and Mexico City. The number of new infections per day in  
318 these three cities has been made available by government officials. Interestingly, the  
319 demographic characteristics of these major cities exhibit important differences, as well as  
320 the types of counter-measures adopted to contain COVID-19.

321 Madrid (a Type-I city) and NYC (nearly a Type-II city) have practically extinguished the  
322 pandemic. Therefore, the position and magnitude of the pandemic peak offers valuable  
323 information to estimate values of the magnitude of social distancing ( $\sigma$ ) and diagnostic  
324 effort ( $\alpha$ ). In contrast, Mexico City has not reached the pandemic peak yet, and struggles to  
325 contain COVID-19 in a challenging demographic situation. We found sets of parameters  
326 that properly describe the evolution of COVID-19 in each of these cities, despite the  
327 obvious differences in the behavior of each progression curve (Figure 4). For Madrid, our  
328 simulations suggest that social distancing measures have achieved a degree of 58% of  
329 reduction in population density ( $\alpha=0.58$ ). However, even considering these relatively  
330 higher values of social distancing, an aggressive testing program ( $\alpha=0.50$ ) was needed to  
331 bend the curve at a cumulative number of  $\sim 70,000$  cases and reduce the emergence of new  
332 cases to the current levels (less than 10 per day). This implies that overall approximately  
333 50% of the active infected subjects were found and quarantined through testing.

334 We also fitted the model to the pandemic progression observed in NYC. NYC is a densely  
335 populated area with a population mark of 8,400,000 inhabitants (i.e., nearly a Type-II city).  
336 Therefore, only a combination of social distancing and intensified testing can stop  
337 progression effectively (Table 1). Our results suggest that NYC has applied a strategy  
338 mostly based on aggressive testing.

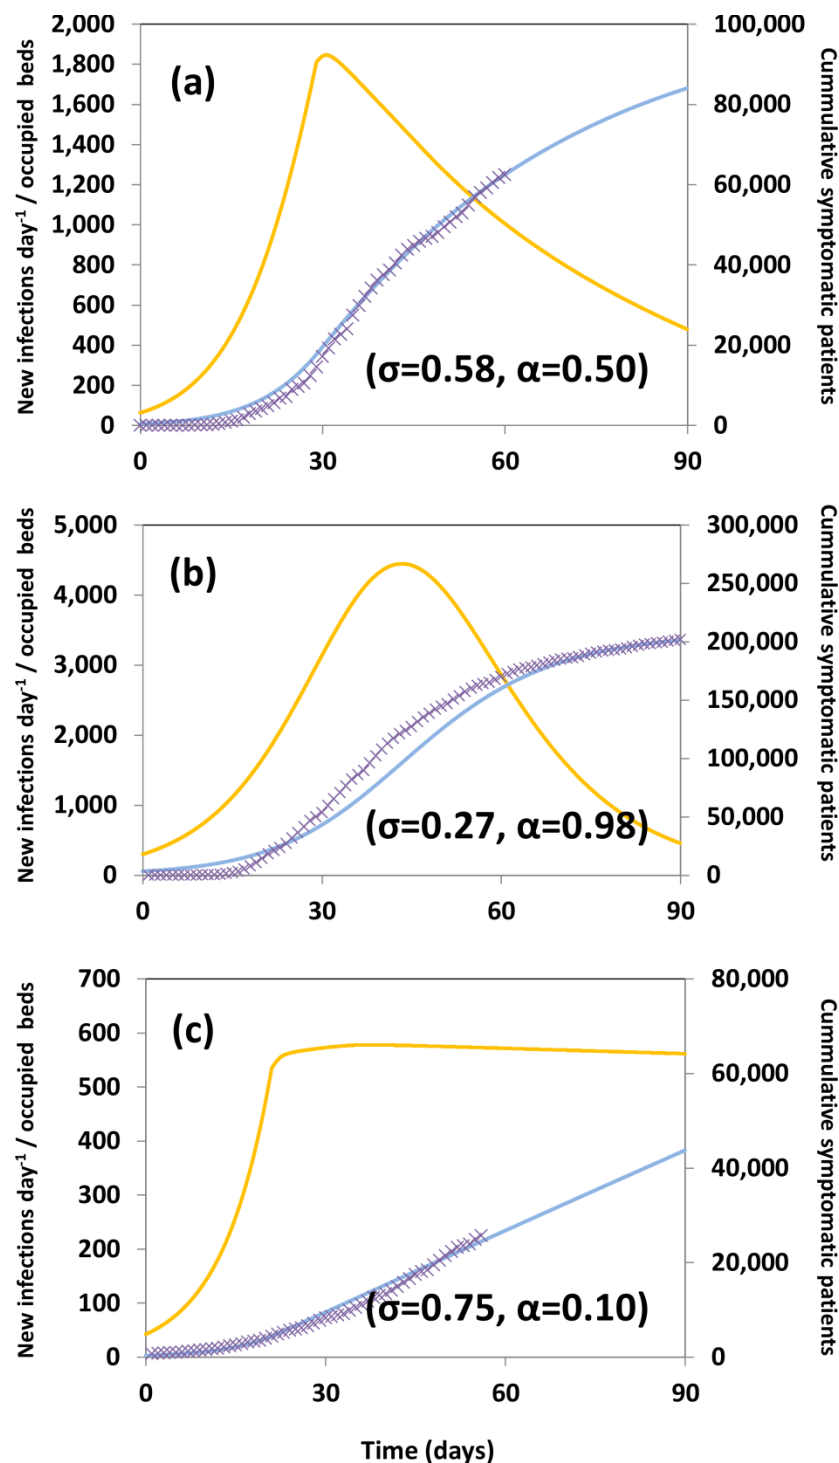

339

340 **Figure 4. Progression of the COVID-19 Pandemic in (a) Madrid, (b) New York City (NYC),**  
341 **and (c) Mexico City.** Actual data points, as officially reported, are shown using circles. Model  
342 predictions of new COVID-19 cases (yellow line) and simulation predictions of the cumulative  
343 number of symptomatic patients (blue line). The values of  $\alpha$  and  $\sigma$  used in the simulations for each  
344 city are indicated within the corresponding panels.

345 Indeed, a scenario based on a sustained level of social distancing of 27% efficacy ( $\sigma=0.27$ ;  
346 effective reduction of 30% in demographic density) and a massive testing effort ( $\alpha=0.98$ ) is  
347 the combination that better recapitulates the actual pandemic evolution in NYC. NYC is,  
348 therefore, a remarkable example of the efficacy of massive diagnosis and quarantine, as a  
349 city that was able to stop COVID-19 progression at a cumulative count of ~250,000  
350 symptomatic subjects, which is about 25% of the maximum expected. In perspective, with  
351 an effective distancing of 27% and no aggressive testing (i.e.,  $\alpha=0.50$  instead of  $\alpha=0.98$ ),  
352 the peak of bed occupancy in the city would have been three-fold higher, causing a total  
353 collapse of the hospital system. Our results also show that demographic density is a key  
354 factor in COVID-19 progression. Note that the testing effort in NYC was more intense than  
355 in Madrid. However, NYC has double the demographic density of Madrid, resulting in a  
356 higher number of those infected than in Madrid (250,000 versus 70,000).

357 While Madrid and NYC have transitioned through the pandemic peak and successfully  
358 extinguished the pandemic, Mexico City is still in the middle of it. Several mathematical  
359 models have been used to forecast pandemic scenarios for Mexico City (33, 34). However,  
360 the predictions of the progression of COVID-19 and the occurrence of the pandemic peak  
361 in the capital of Mexico have not been accurate. Mexico City has a demographic density of  
362 1.69 times that of Madrid and a population of more than 15,000 within the city limits.

363 In terms of demographic density, Mexico City lies between a Type-I and Type-II city,  
364 possessing a demographic density 1.69 times greater than Madrid. However, in terms of  
365 population, Mexico City is double that of NYC. The Mexico City Metropolitan Area,  
366 which comprehends the city and its surrounding municipalities in Estado de México,  
367 houses 25,000,000 inhabitants. From the scenarios simulated before (Figure 3), we may  
368 readily infer that only a combination of aggressive social distancing and massive testing

369 effort can stop pandemic progression in Mexico City. However, Mexican public health  
370 officials have publicly stated their decision to deemphasize diagnostics, instead privileging  
371 social distancing in the entire Mexican territory. Figure 4c compares the actual evolution of  
372 the number of cases in Mexico City versus the prediction of our model for a scenario where  
373 social distancing is set at  $\sigma=0.75$  (75% effective reduction on demographic density) and the  
374 testing effort at  $\alpha=0.10\%$  (only 10% of infected individuals are effectively quarantined after  
375 being diagnosed). The Mexican strategy has been successful in delaying the pandemic's  
376 progression, but not in bending the slope of the epidemic curve. As a result, Mexico City is  
377 steadily positioned in a pandemic plateau, with a nearly constant number of cases per day  
378 (600 cases), which is consistent with journalistic information and official data  
379 (<https://coronavirus.gob.mx/datos/>)(35).

380

### 381 **Concluding remarks**

382 Here we introduce a mathematical model, based on demographic and clinical data that  
383 enables evaluating the relative benefit of social distancing and massive testing. Using this  
384 simple model, we investigate scenarios of COVID-19 evolution in two types of  
385 representative cities (i.e., 3,500,000 inhabitants and 5,000 hab km<sup>2</sup>, and 5.0 X 10<sup>6</sup>  
386 inhabitants and 10,000 hab km<sup>2</sup>).

387 Our modeling simulations show that for Type-I cities, extreme and sustained social  
388 distancing (i.e., effectively decreasing the demographic density by 60% or more) may  
389 extinguish the pandemic progression. However, in Type-II cities (or larger), only  
390 combinations of social distancing and aggressive testing can effectively control the  
391 pandemic evolution. This finding has relevant implications for the planning of  
392 countermeasures for the effective containment of pandemic progression and for the

393 design/redesign of urban areas. The concept of sustainability and cost-effectiveness of  
394 densely populated urban areas has to be revisited. Our results make explicit that large cities  
395 are highly vulnerable to epidemic crisis.

396 In principle, this model can be adapted to any urban area by setting the population and the  
397 demographic density. The predictions on the evolution of COVID-19 based on this  
398 mathematical model could represent important tools for designing and/or evaluating  
399 countermeasures.

400

#### 401 **Acknowledgments**

402 MMA and GTdS acknowledge the funding received from CONACyT (Consejo Nacional de  
403 Ciencia y Tecnología, México) and Tecnológico de Monterrey.

404

#### 405 **Author contributions**

406 MMA and GTdS collected and analyzed epidemiology data. MMA formulated the model  
407 and ran the simulations. MMA and GTdS wrote the manuscript. Both authors reviewed and  
408 approved the manuscript.

409

#### 410 **Competing interest**

411 The authors declare no competing interests.

412

#### 413 **References:**

- 414 1. M. L. Holshue et al., First Case of 2019 Novel Coronavirus in the United States. N.  
415 Engl. J. Med. (2020), doi:10.1056/nejmoa2001191.

- 416 2. Coronavirus Research Center. Johns Hopkins University. (2020)  
417 <https://coronavirus.jhu.edu/>
- 418 3. J. Cohen, K. Kupferschmidt, Countries test tactics in “war” against COVID-19.  
419 *Science*. 367, 1287–1288 (2020).
- 420 4. D. Lee, J. Lee, Testing on the move: South Korea’s rapid response to the COVID-19  
421 pandemic. *Transp. Res. Interdiscip. Perspect.* 5 (2020), p. 100111.
- 422 5. Our world in data. (2020) <https://ourworldindata.org/coronavirus-testing>.
- 423 6. A. Terriau, J. Albertini, A. Poirier, Q. Le Bastard, Impact of virus testing on  
424 COVID-19 case fatality rate: estimate using a fixed-effects model,  
425 doi:10.1101/2020.04.26.20080531.
- 426 7. L. Bao et al., bioRxiv, in press, doi:10.1101/2020.03.13.990226.
- 427 8. E. Prompetchara, C. Ketloy, T. Palaga, Allergy and Immunology Immune responses  
428 in COVID-19 and potential vaccines: Lessons learned from SARS and MERS  
429 epidemic, doi:10.12932/AP-200220-0772.
- 430 9. W. Liu et al., Two-Year Prospective Study of the Humoral Immune Response of  
431 Patients with Severe Acute Respiratory Syndrome. *J. Infect. Dis.* 193, 792–795  
432 (2006).
- 433 10. CNBC. "New York antibody study estimates 13.9% of residents have had the  
434 coronavirus, Gov. Cuomo says". (2020) [https://www.cnbc.com/2020/04/23/new-](https://www.cnbc.com/2020/04/23/new-york-antibody-study-estimates-13point9percent-of-residents-have-had-the-coronavirus-cuomo-says.html)  
435 [york-antibody-study-estimates-13point9percent-of-residents-have-had-the-](https://www.cnbc.com/2020/04/23/new-york-antibody-study-estimates-13point9percent-of-residents-have-had-the-coronavirus-cuomo-says.html)  
436 [coronavirus-cuomo-says.html](https://www.cnbc.com/2020/04/23/new-york-antibody-study-estimates-13point9percent-of-residents-have-had-the-coronavirus-cuomo-says.html)
- 437 11. L. Elizondo-Montemayor et al., Seroprevalence of antibodies to influenza  
438 A/H1N1/2009 among transmission risk groups after the second wave in Mexico, by  
439 a virus-free ELISA method. *Int. J. Infect. Dis.* 15, e781–e786 (2011).

- 440 12. S. M. Zimmer et al., Seroprevalence Following the Second Wave of Pandemic 2009  
441 H1N1 Influenza in Pittsburgh, PA, USA, doi:10.1371/journal.pone.0011601.
- 442 13. L. Lan et al., Positive RT-PCR Test Results in Patients Recovered From COVID-19.  
443 JAMA (2020), doi:10.1001/jama.2020.2783.
- 444 14. Q. Bi et al., medRxiv, in press, doi:10.1101/2020.03.03.20028423.
- 445 15. R. Wölfel et al., Virological assessment of hospitalized patients with COVID-2019.  
446 Nature. 581, 465–469 (2020).
- 447 16. L. Zou et al., SARS-CoV-2 Viral Load in Upper Respiratory Specimens of Infected  
448 Patients. N. Engl. J. Med. 382, 1177–1179 (2020).
- 449 17. Y. Bai et al., Presumed Asymptomatic Carrier Transmission of COVID-19. JAMA  
450 (2020), doi:10.1001/jama.2020.2565.
- 451 18. C. R. MacIntyre, Global spread of COVID-19 and pandemic potential. Glob.  
452 Biosecurity. 1 (2020), doi:10.31646/gbio.55.
- 453 19. C. C. Lai, T. P. Shih, W. C. Ko, H. J. Tang, P. R. Hsueh, Severe acute respiratory  
454 syndrome coronavirus 2 (SARS-CoV-2) and coronavirus disease-2019 (COVID-19):  
455 The epidemic and the challenges. Int. J. Antimicrob. Agents. 55 (2020), p. 105924.
- 456 20. S. Jung et al., Real-Time Estimation of the Risk of Death from Novel Coronavirus  
457 (COVID-19) Infection: Inference Using Exported Cases. J. Clin. Med. 9, 523 (2020).
- 458 21. Z. Xu et al., Pathological findings of COVID-19 associated with acute respiratory  
459 distress syndrome. Lancet Respir. Med. 0 (2020), doi:10.1016/S2213-  
460 2600(20)30076-X.
- 461 22. R. Porcheddu, C. Serra, D. Kelvin, N. Kelvin, S. Rubino, Similarity in Case Fatality  
462 Rates (CFR) of COVID-19/SARS-COV-2 in Italy and China. J. Infect. Dev. Ctries.  
463 14, 125–128 (2020).

- 464 23. N. M. Linton et al., Epidemiological characteristics of novel coronavirus infection: A  
465 statistical analysis of publicly available case data,  
466 doi:10.1101/2020.01.26.20018754.
- 467 24. J. A. Lewnard et al., Incidence, clinical outcomes, and transmission dynamics of  
468 severe coronavirus disease 2019 in California and Washington: Prospective cohort  
469 study. *BMJ*. 369 (2020), doi:10.1136/bmj.m1923.
- 470 25. W. Guan et al., Clinical Characteristics of Coronavirus Disease 2019 in China. *N.*  
471 *Engl. J. Med.* 382, 1708–1720 (2020).
- 472 26. L. Pan et al., Clinical characteristics of COVID-19 patients with digestive symptoms  
473 in Hubei, China: A descriptive, cross-sectional, multicenter study. *Am. J.*  
474 *Gastroenterol.* 115, 766–773 (2020).
- 475 27. L. Rosenbaum, Facing Covid-19 in Italy - Ethics, Logistics, and Therapeutics on the  
476 Epidemic's Front Line. *N. Engl. J. Med.* 382, 1873–1875 (2020).
- 477 28. City Mayors. "Largest cities in the world by population". (2020)  
478 <http://www.citymayors.com/statistics/largest-cities-population-125.html>).
- 479 29. R. M. Anderson, H. Heesterbeek, D. Klinkenberg, T. D. Hollingsworth, How will  
480 country-based mitigation measures influence the course of the COVID-19 epidemic?  
481 *Lancet*. 395 (2020), pp. 931–934.
- 482 30. Isolation, quarantine, social distancing and community containment: pivotal role for  
483 old-style public health measures in the novel coronavirus (2019-nCoV) outbreak |  
484 *Journal of Travel Medicine* | Oxford Academic, (available at  
485 <https://academic.oup.com/jtm/article/27/2/taaa020/5735321>).
- 486 31. P. G. T. Walker et al., The impact of COVID-19 and strategies for mitigation and  
487 suppression in low- and middle-income countries. *Science* (80-. ), eabc0035 (2020).



- 488 32. S. M. Kissler, C. Tedijanto, E. Goldstein, Y. H. Grad, M. Lipsitch, Projecting the  
489 transmission dynamics of SARS-CoV-2 through the postpandemic period. *Science*.  
490 368, 860–868 (2020).
- 491 33. R. H. Mena et al., Using posterior predictive distributions to analyse epidemic  
492 models: COVID-19 in Mexico City (2020) (available at  
493 <http://arxiv.org/abs/2005.02294>).
- 494 34. U. Avila-Ponce de León, Á. G. C. Pérez, E. Avila-Vales, medRxiv, in press,  
495 doi:10.1101/2020.05.11.20098517.
- 496 35. CONACyT. COVID-19 México. Tablero México. (2020)  
497 <https://coronavirus.gob.mx/datos/>  
498

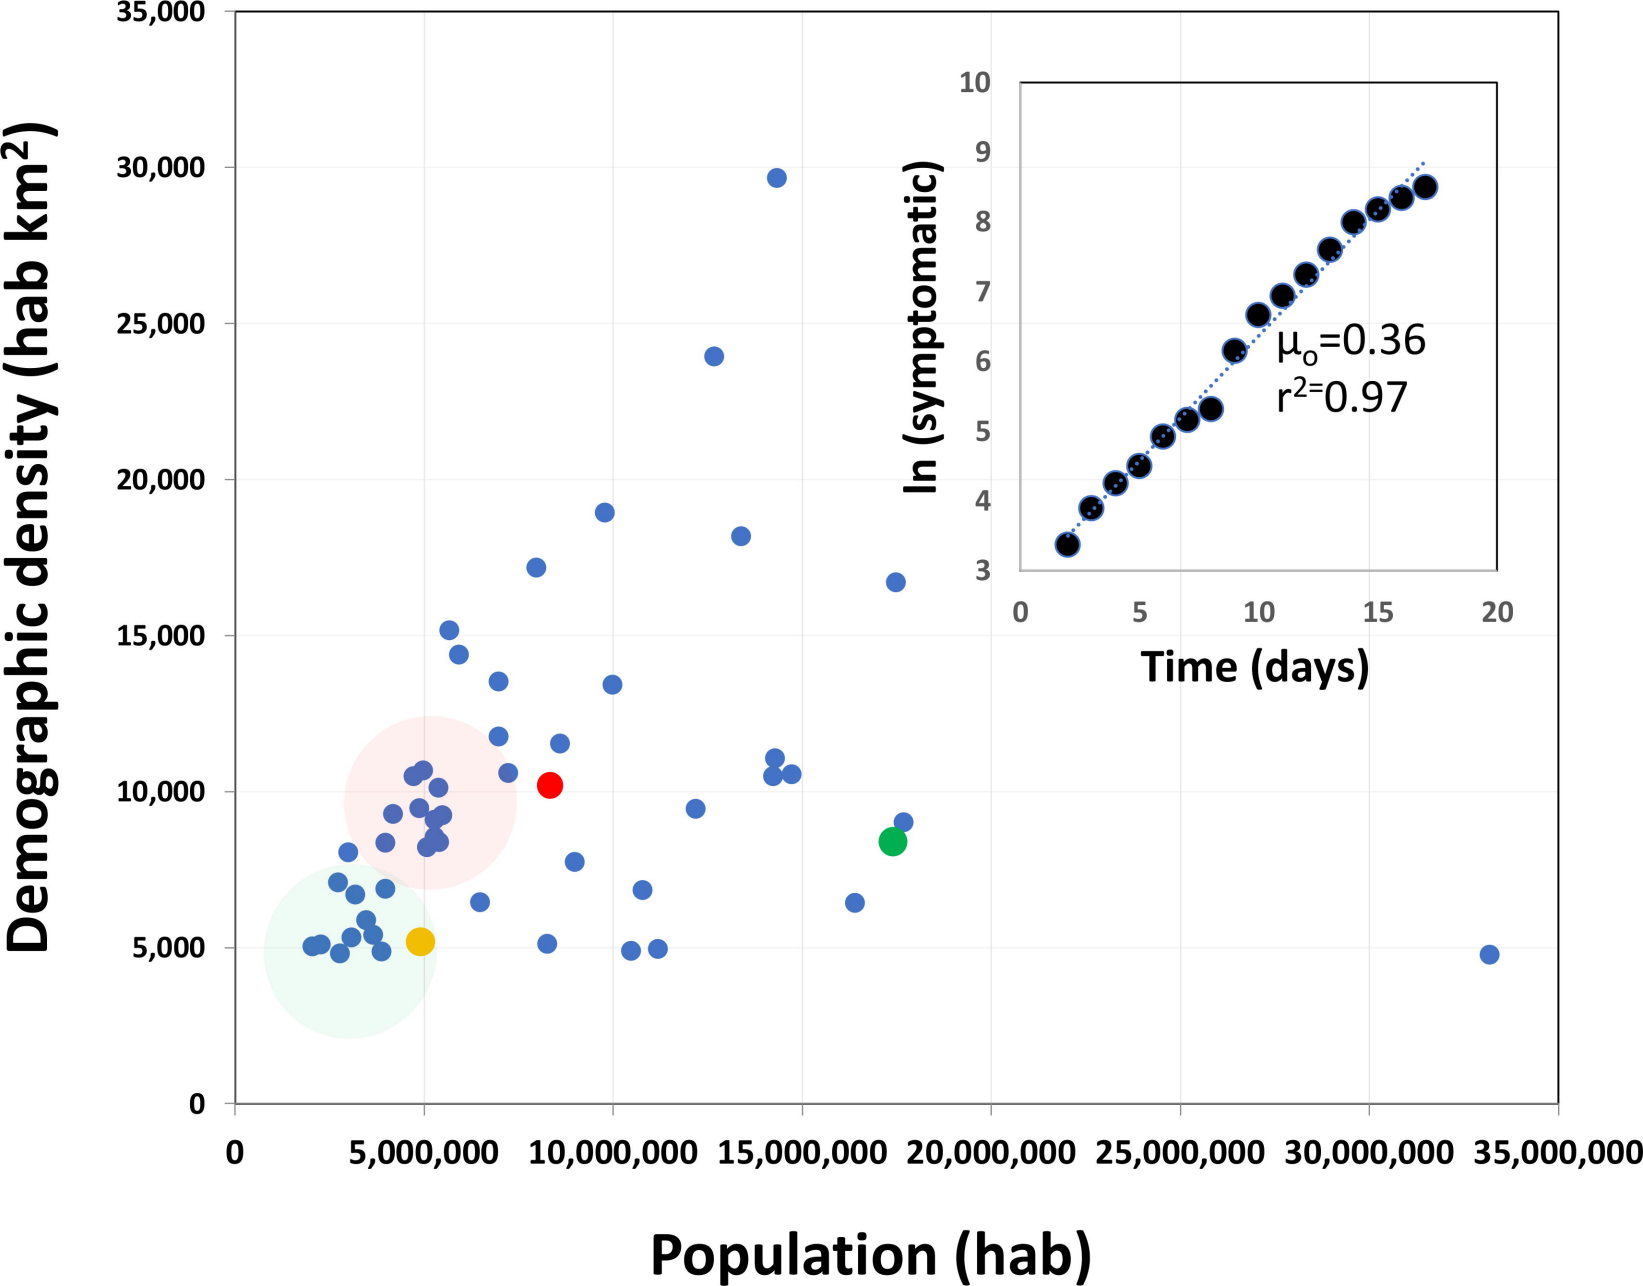

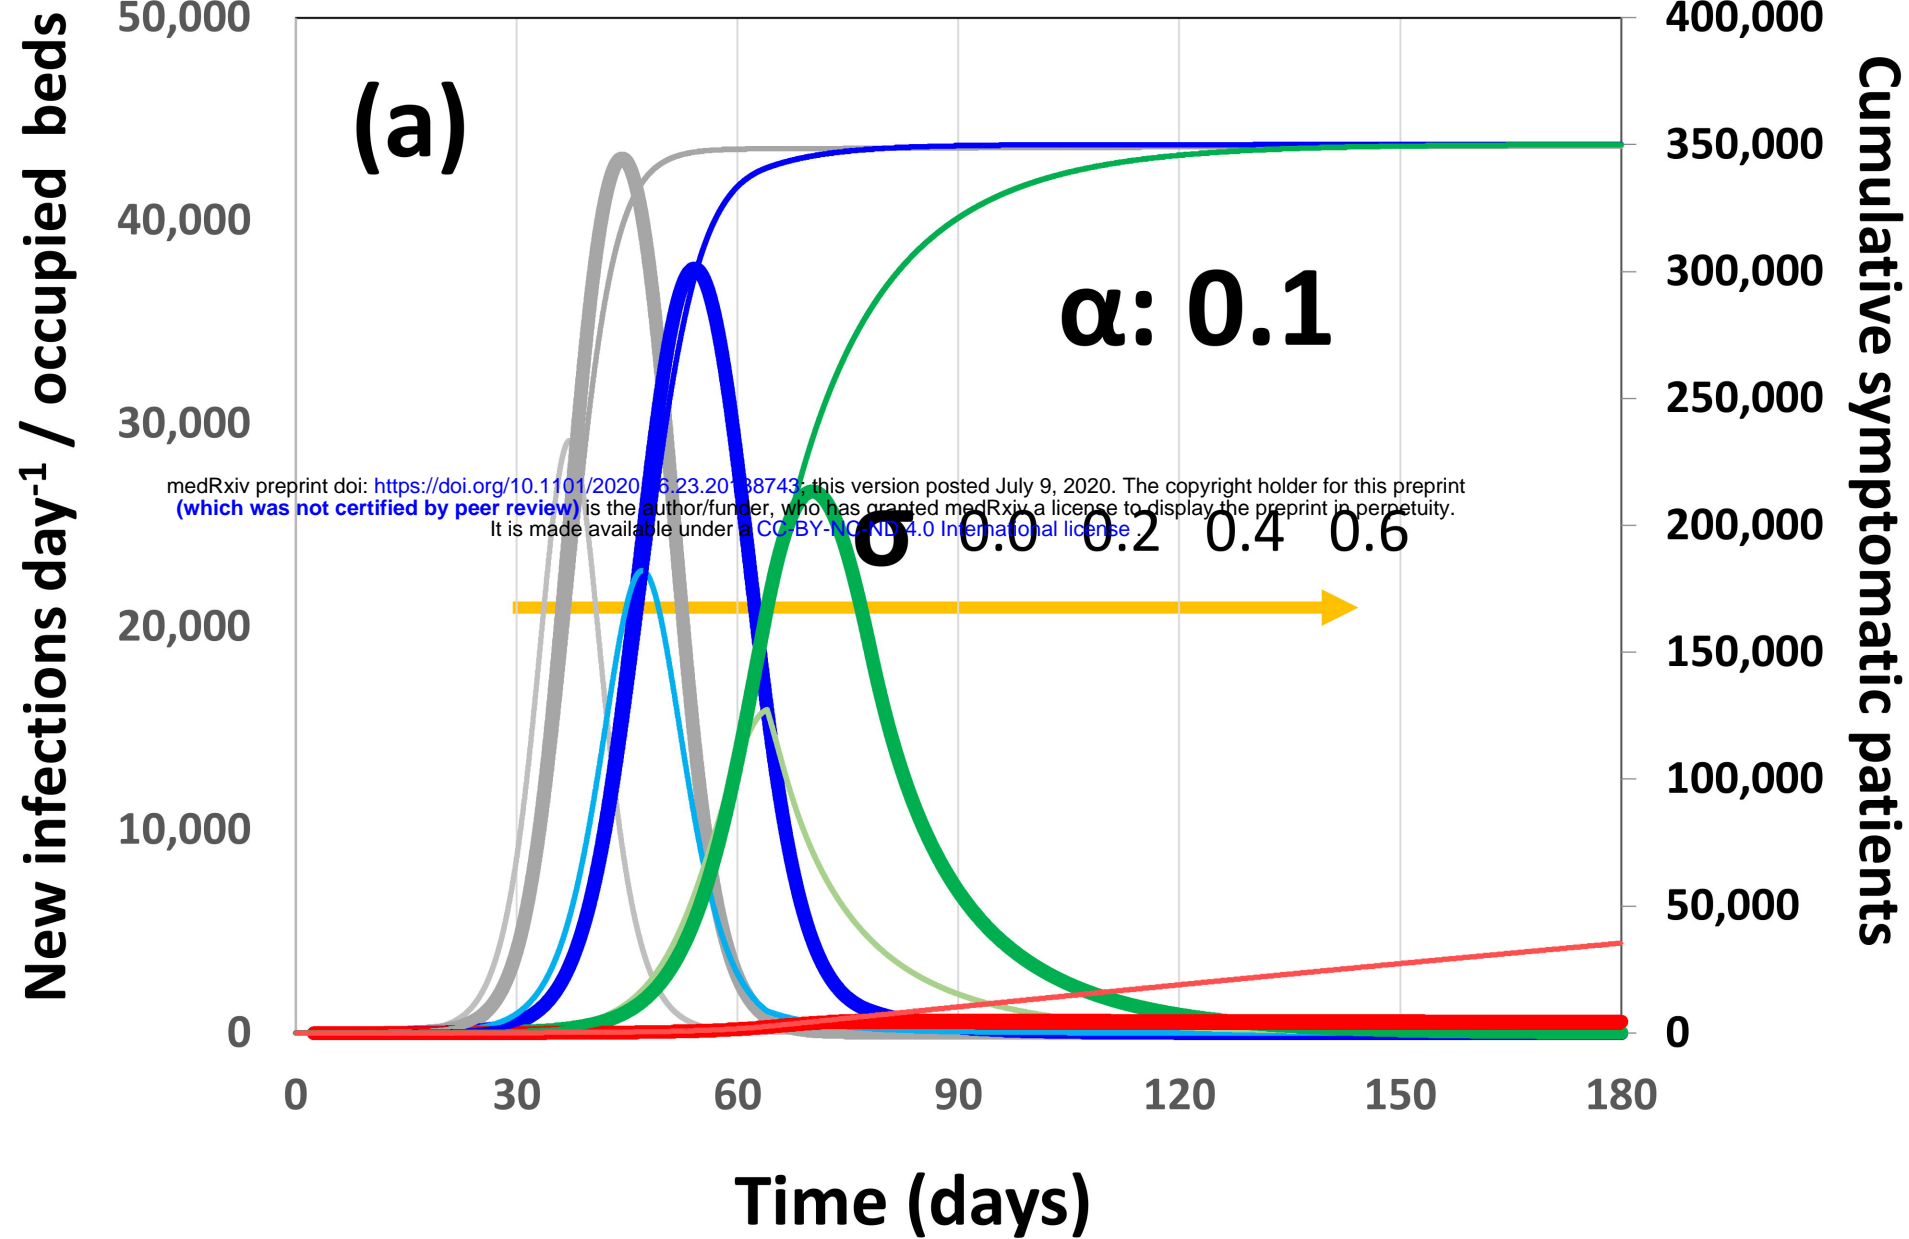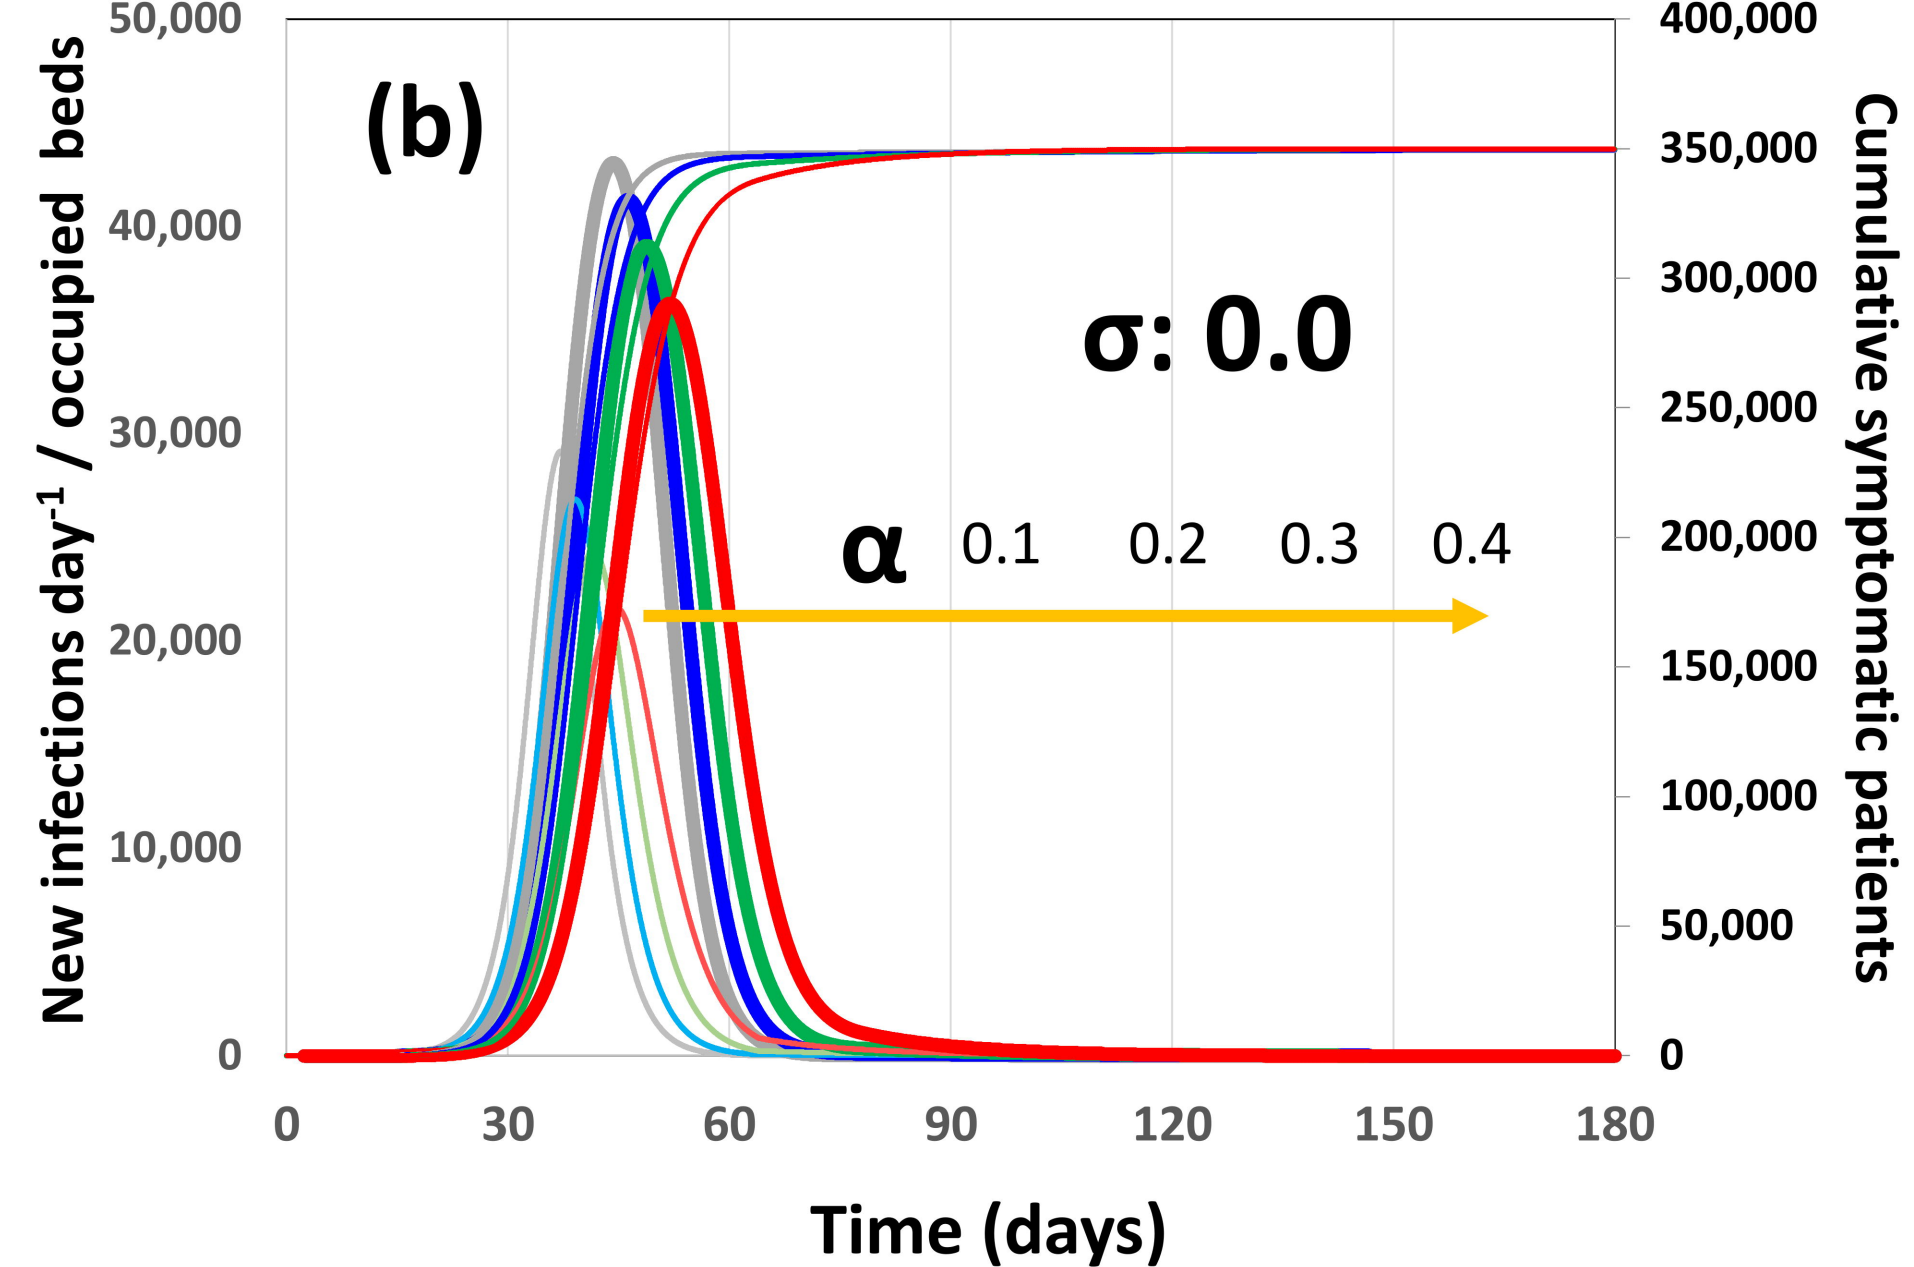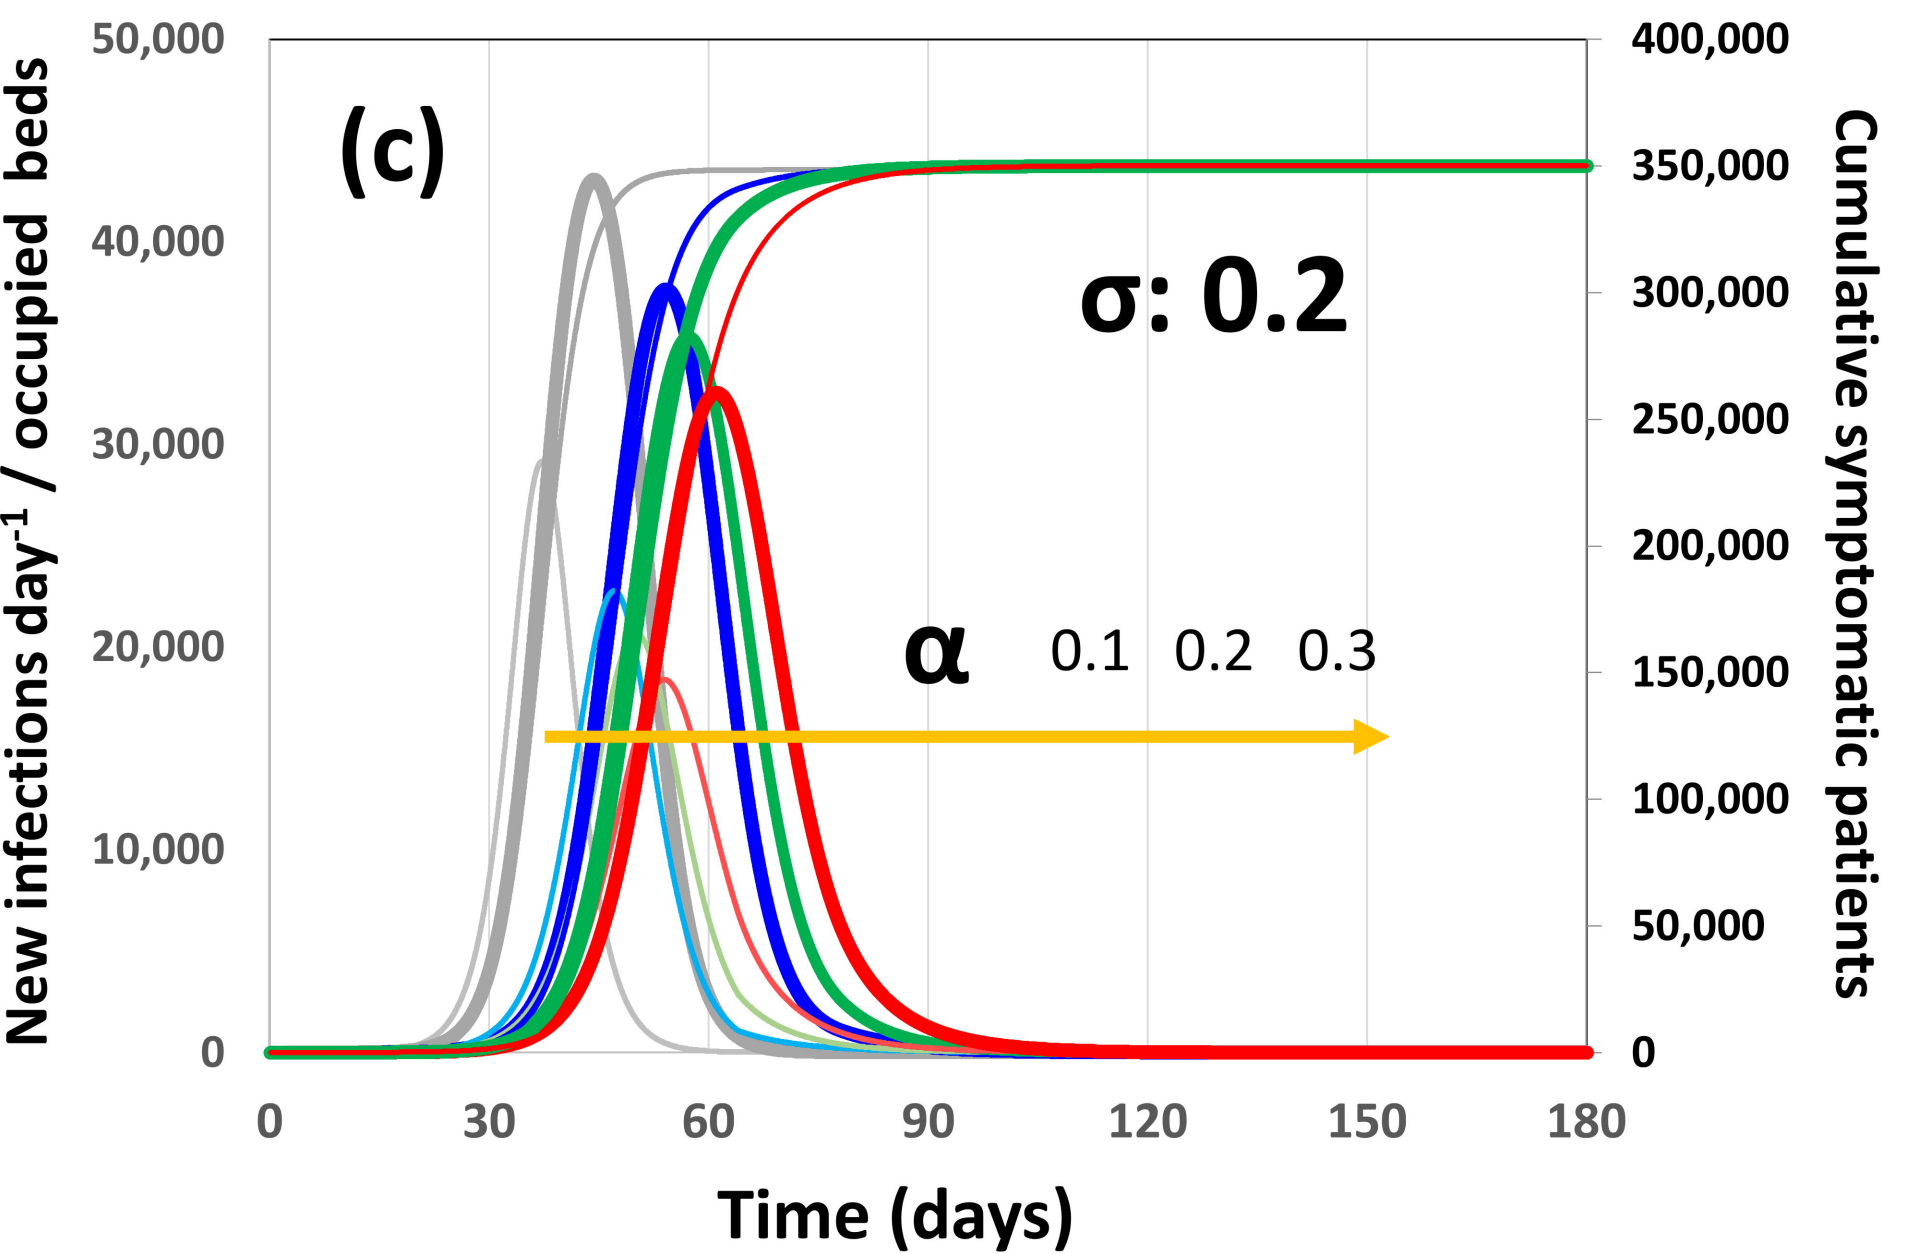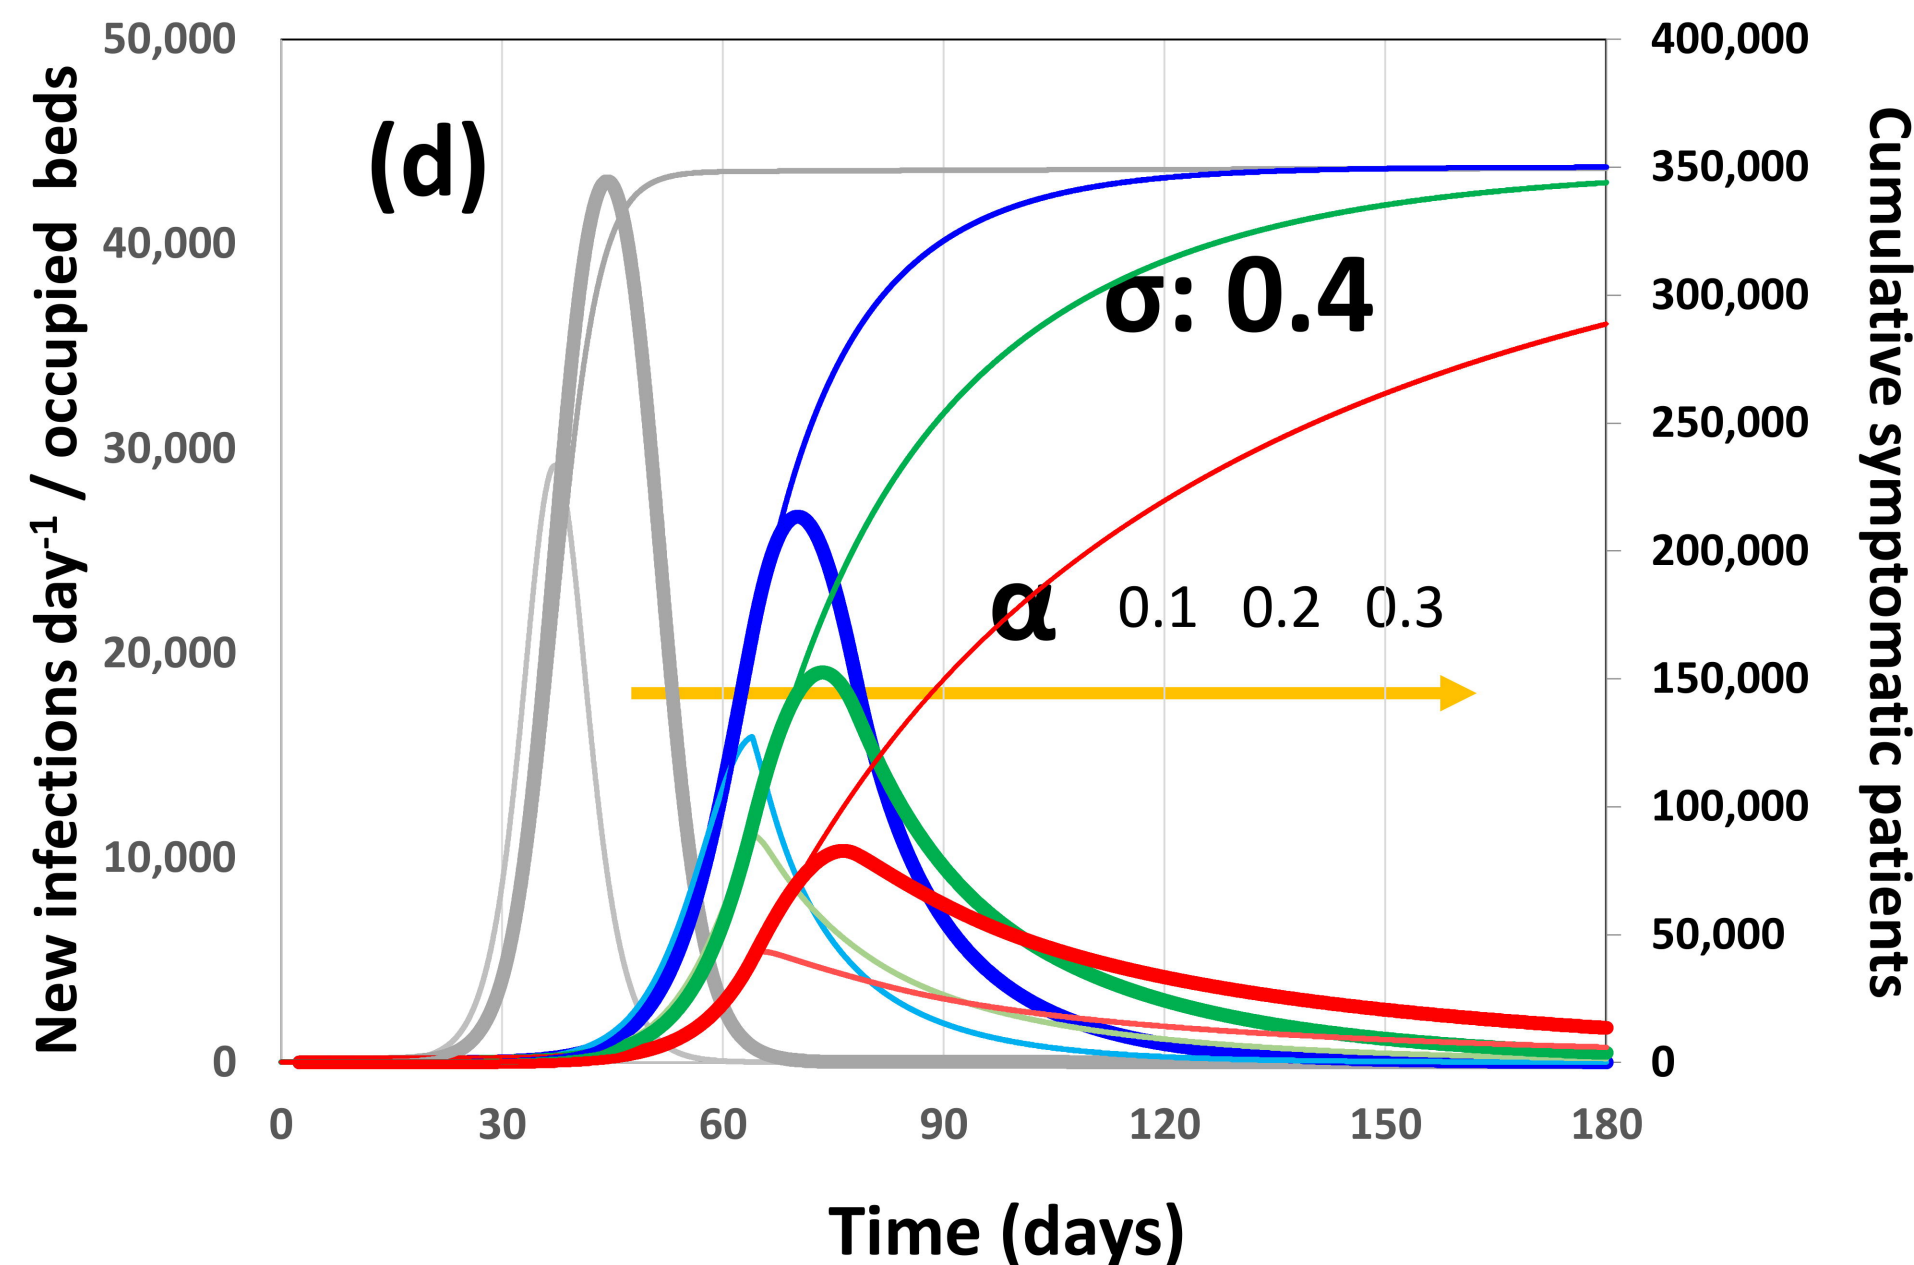

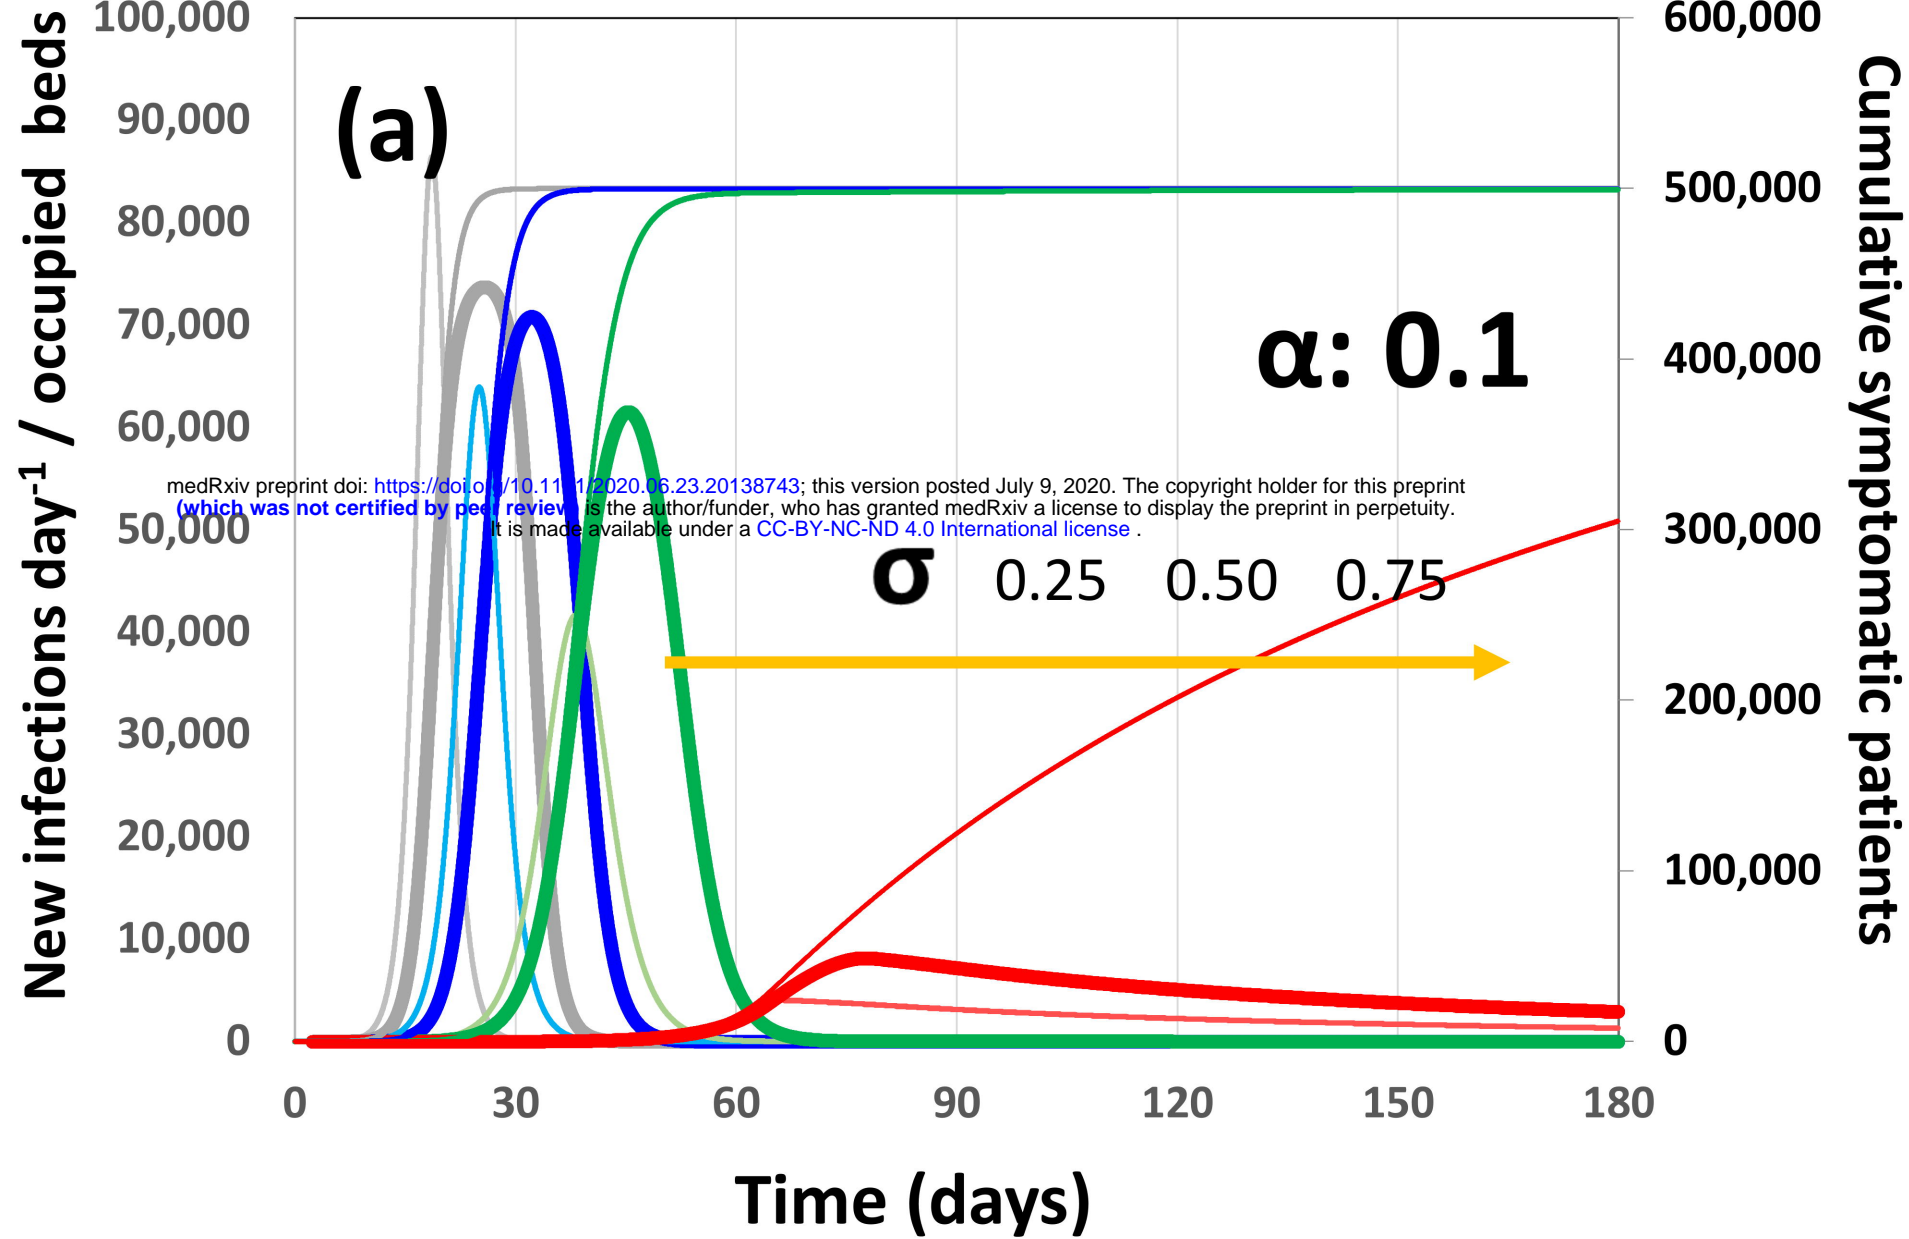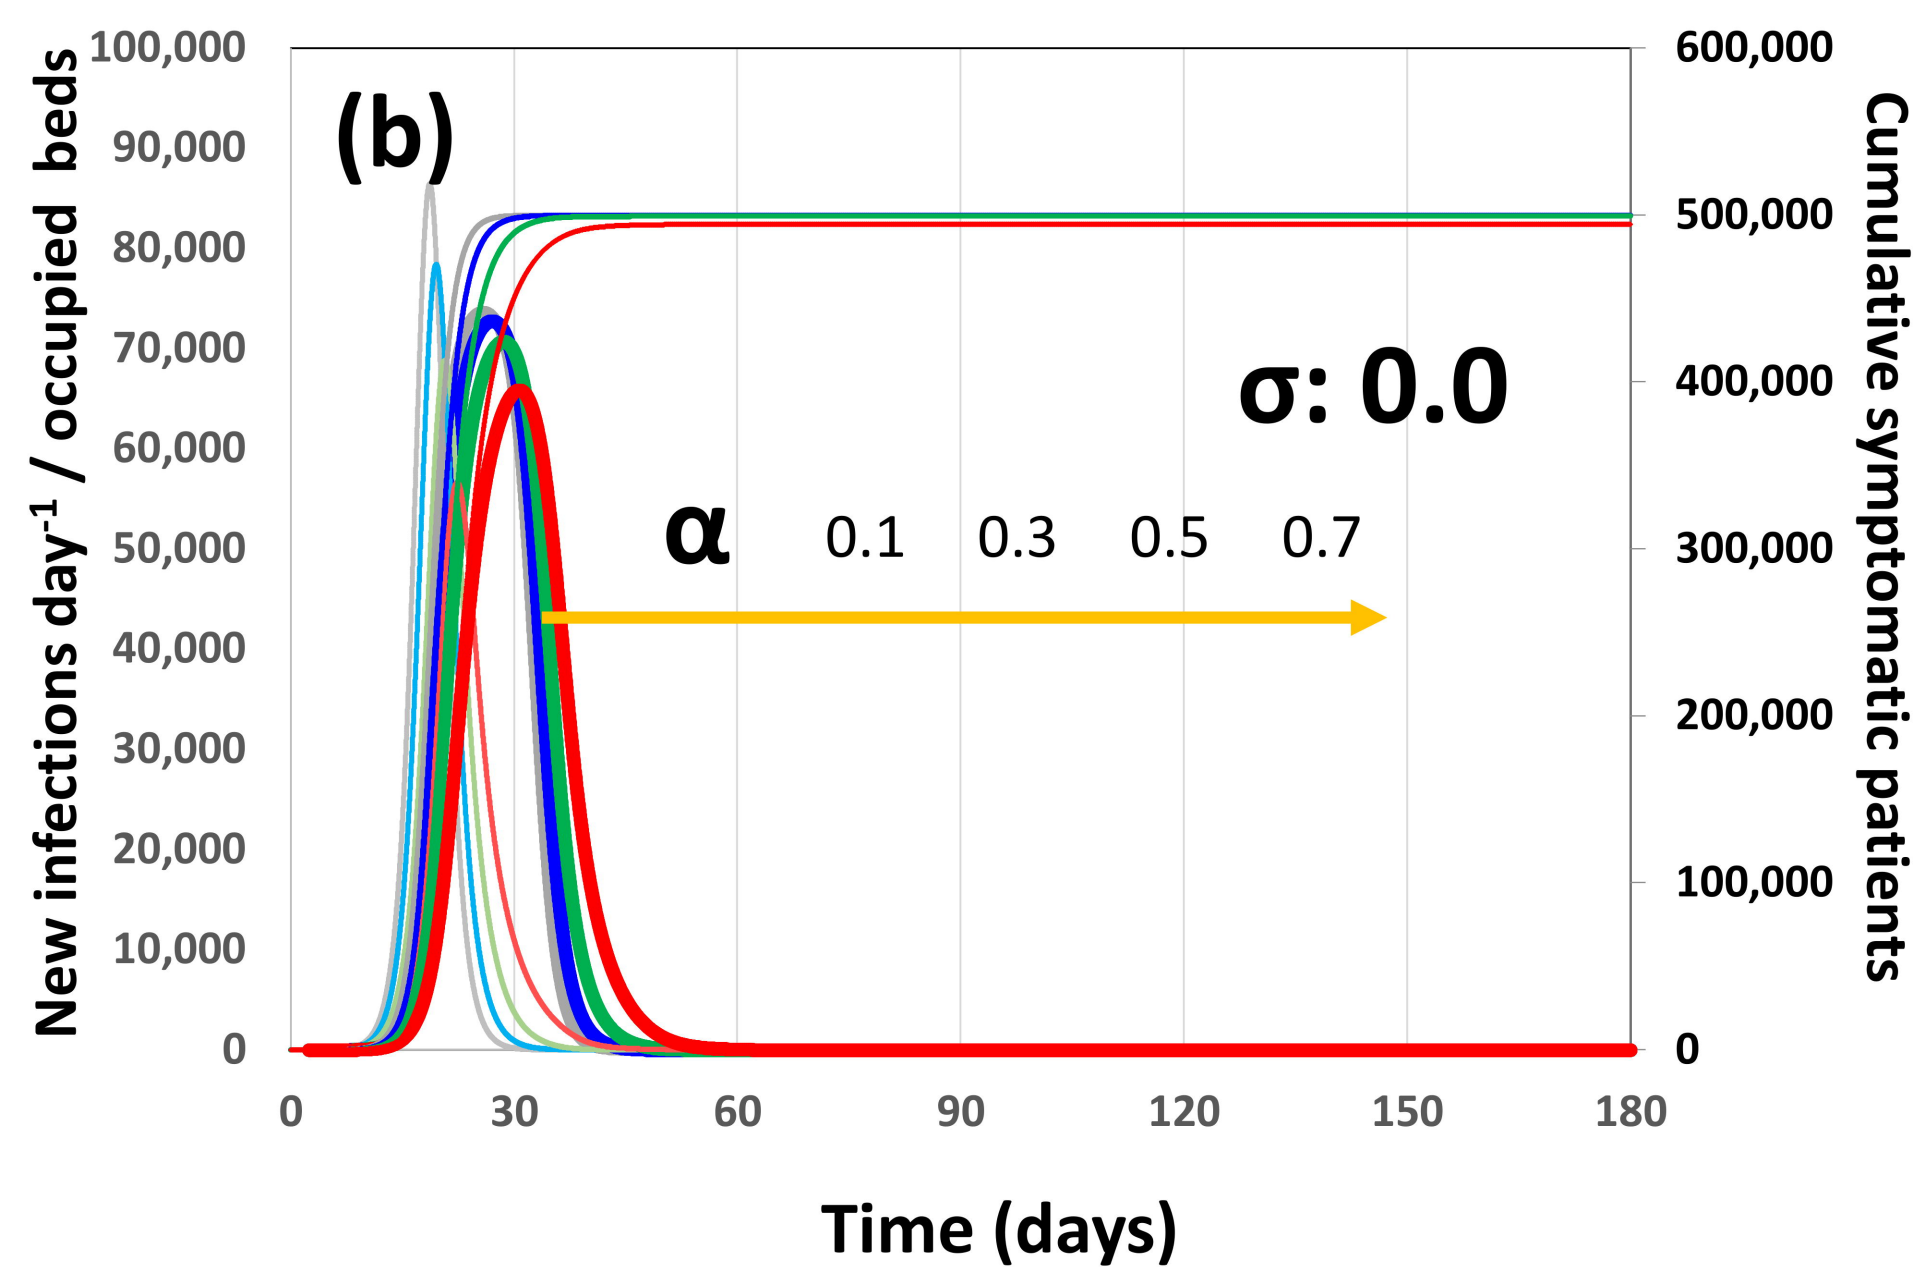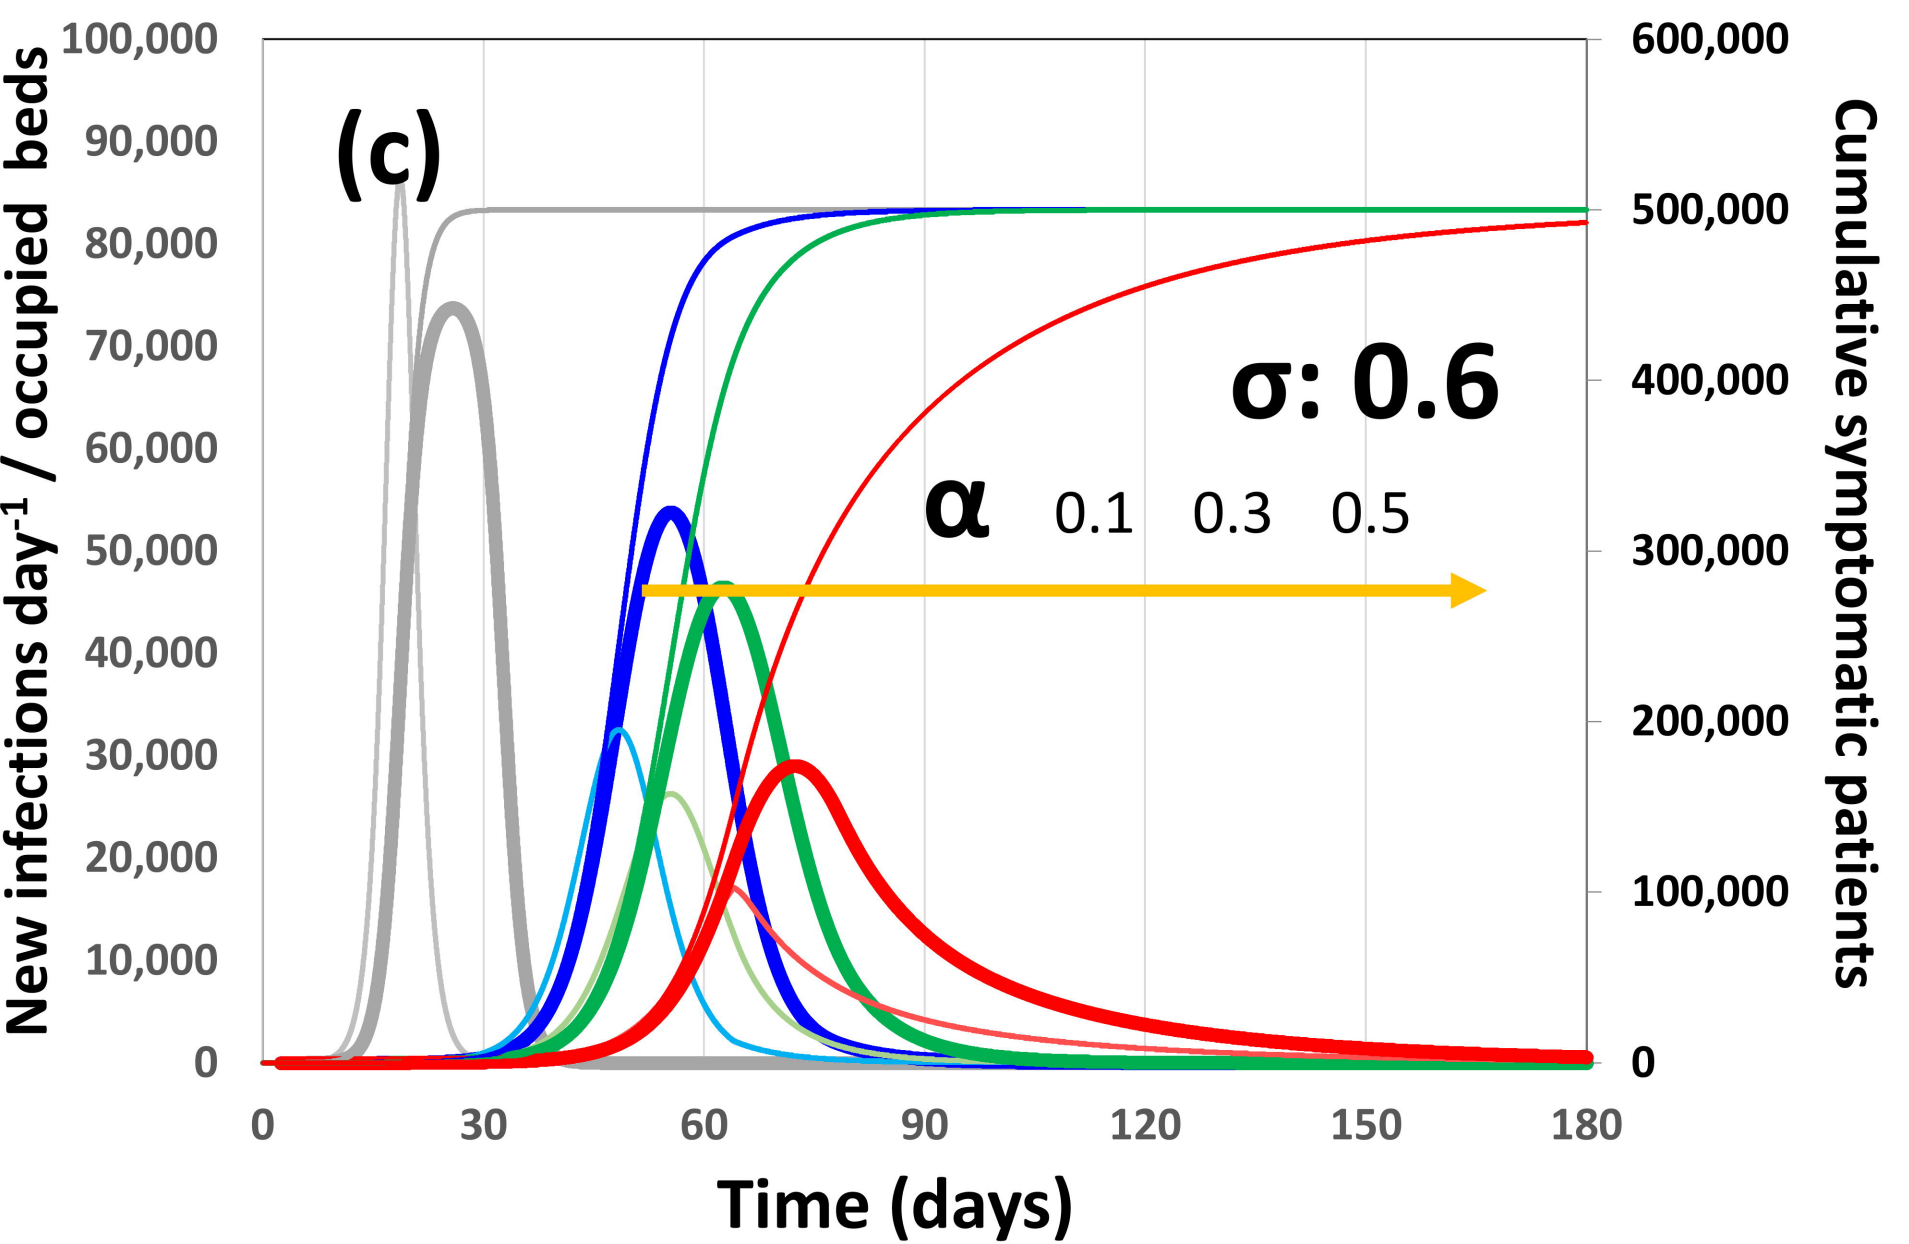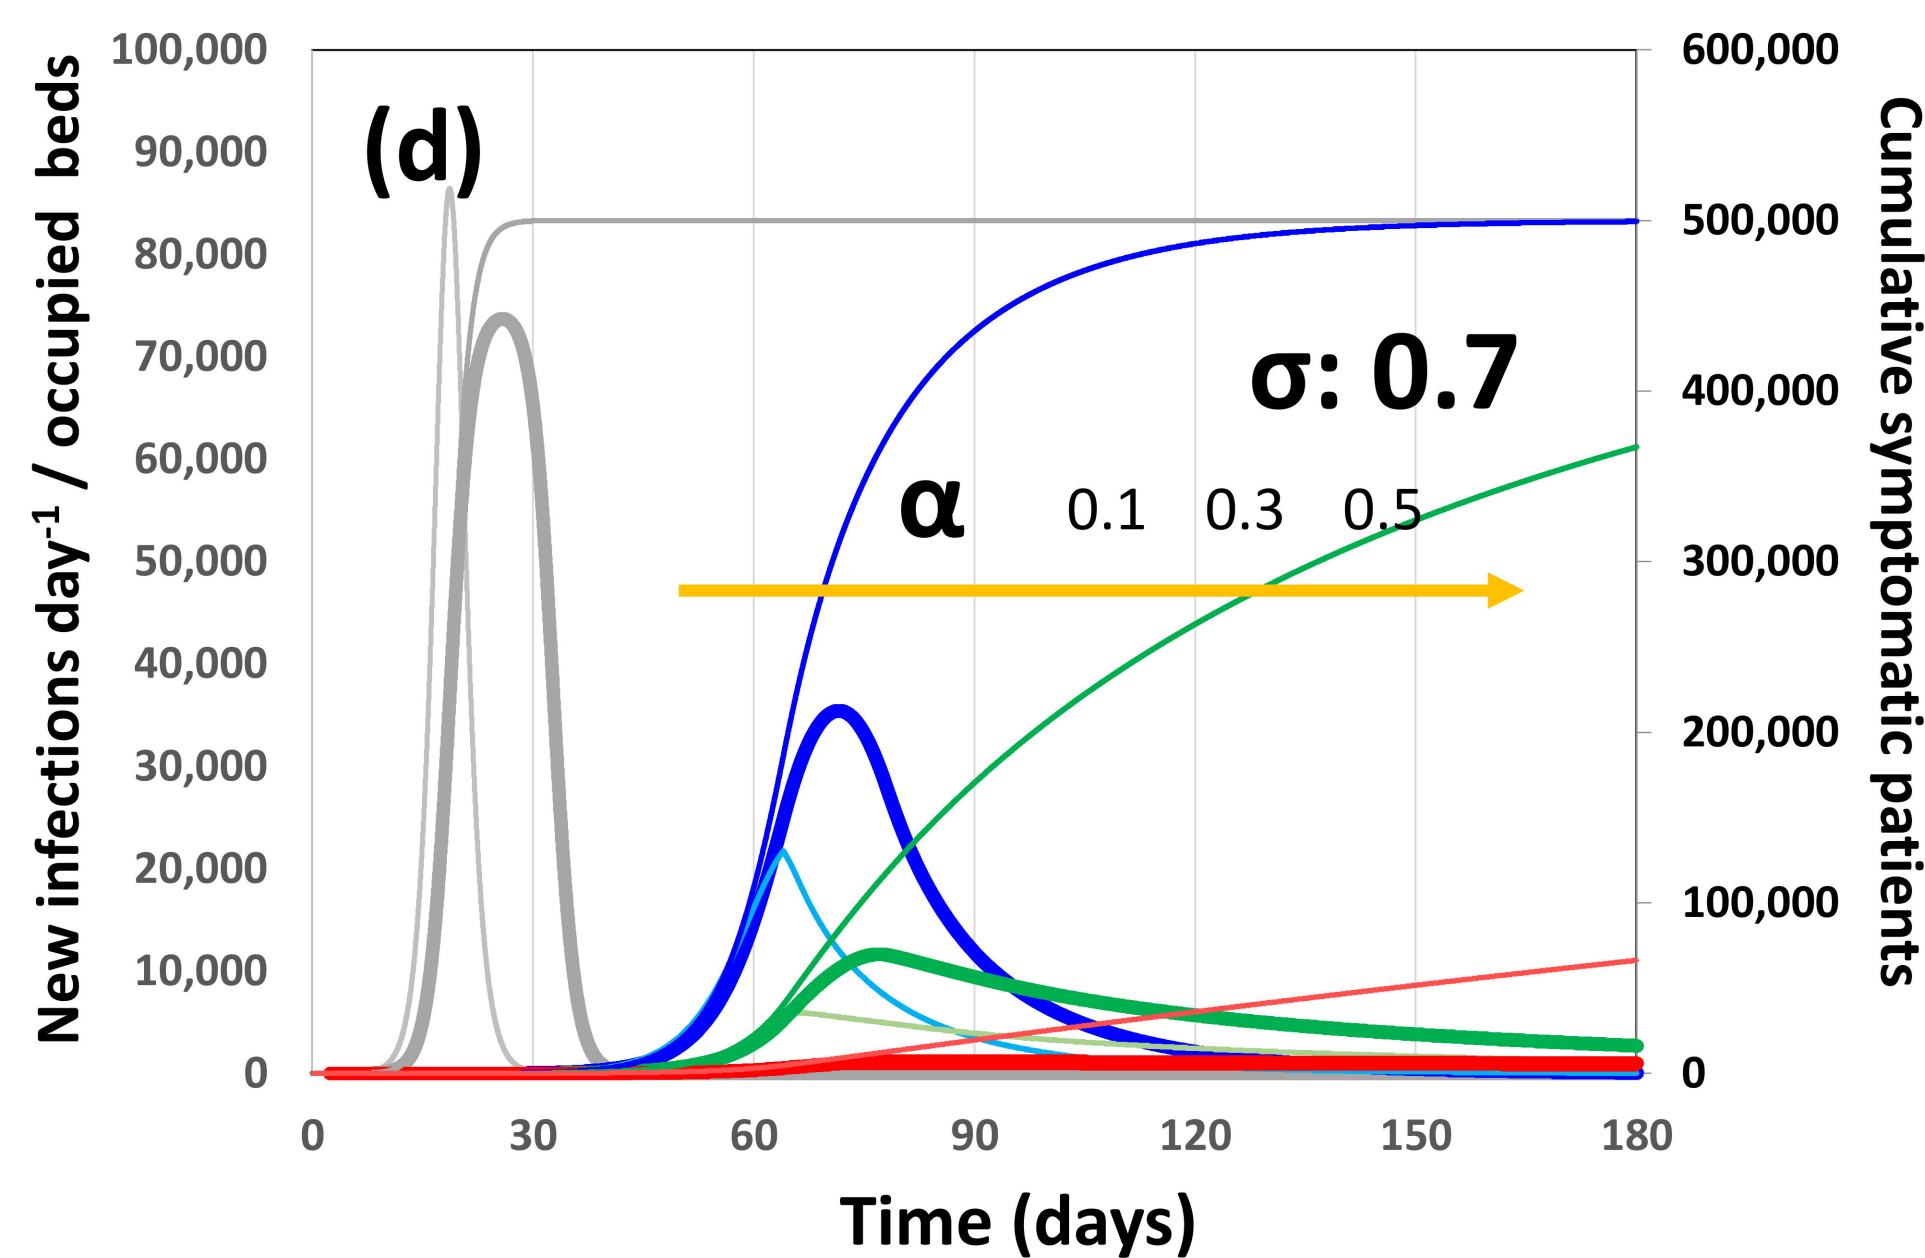

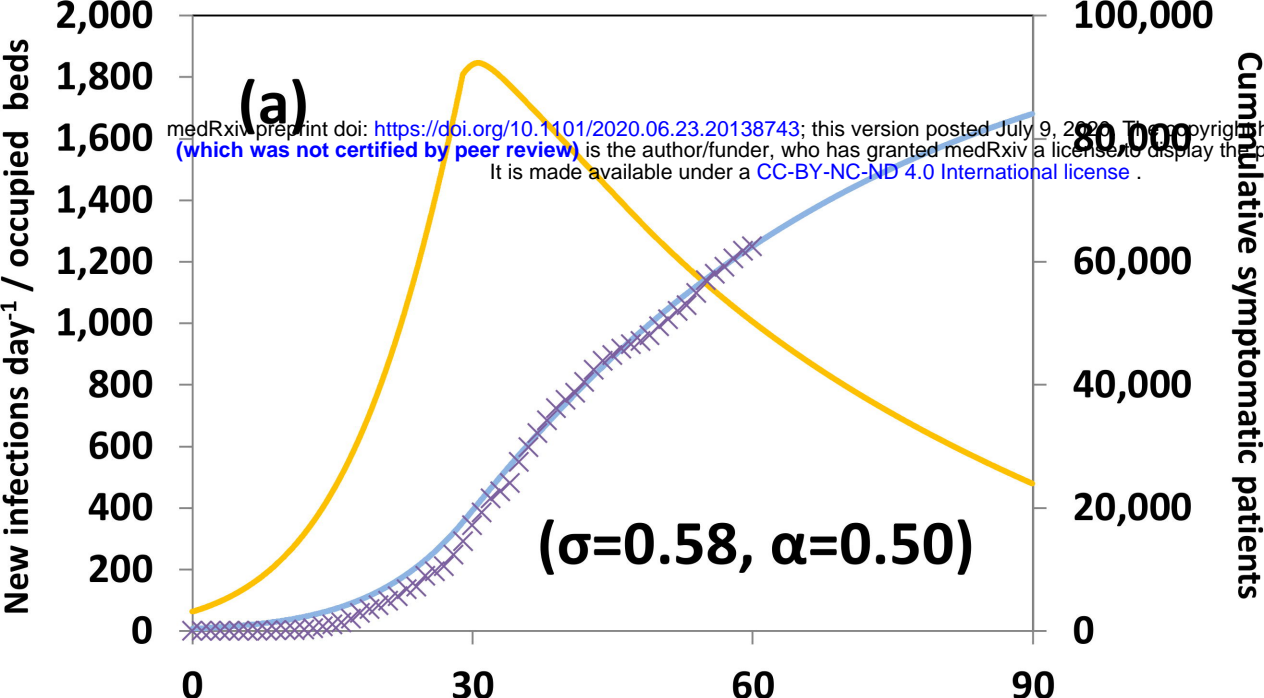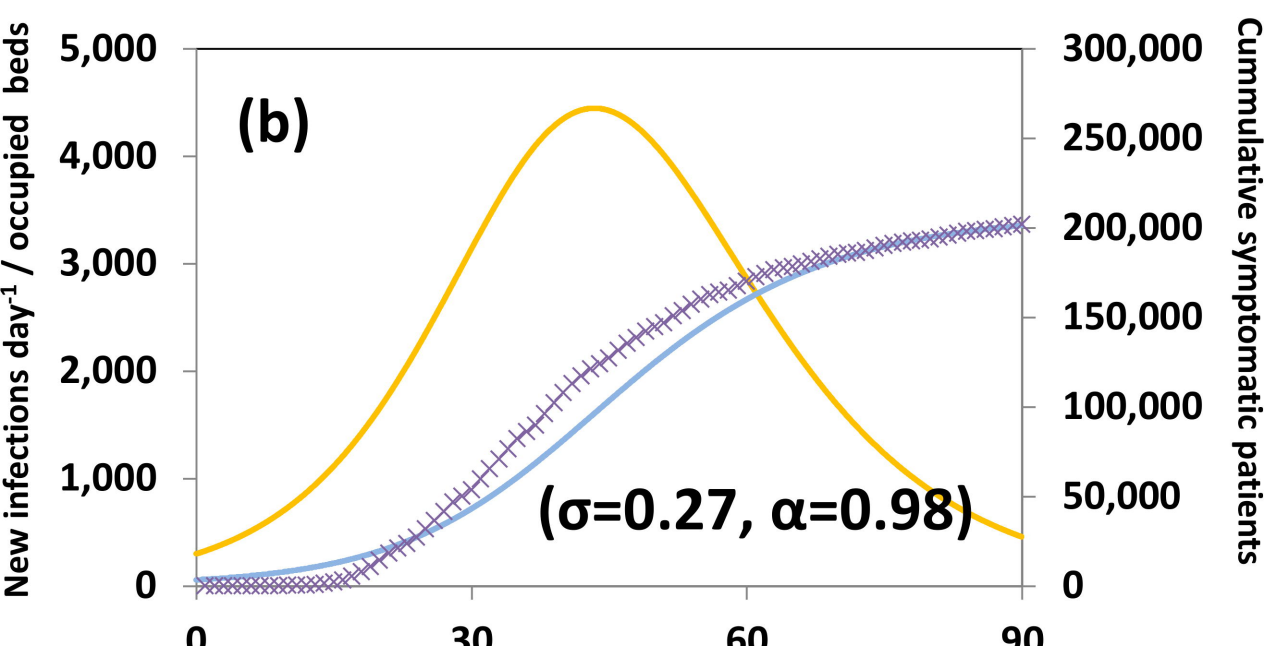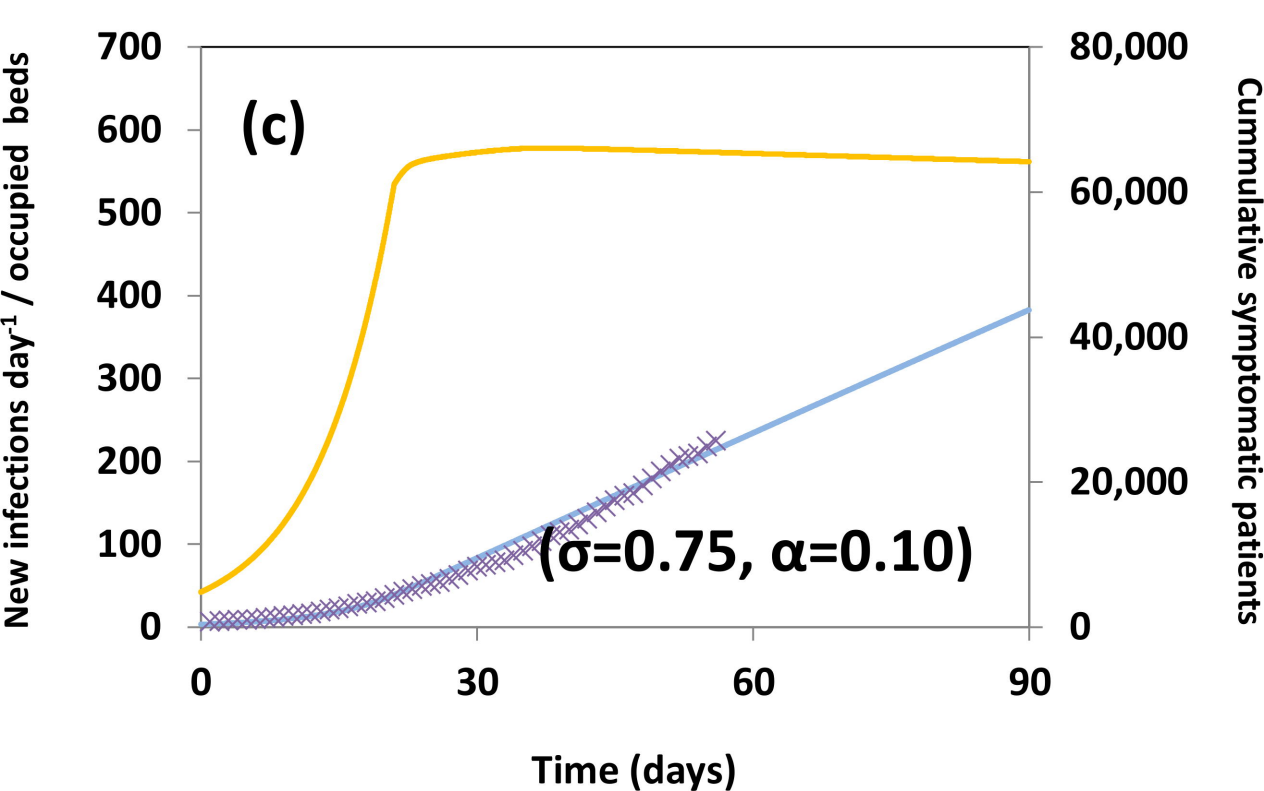

Source: https://medrxiv.org/content/10.1101/2020.06.23.20138743v2.full.pdf
